1 **Title**

2 A native prokaryotic voltage-dependent calcium channel with a novel selectivity filter  
3 sequence

4

5 **Authors**

6 Takushi Shimomura<sup>1,3</sup>, Yoshiki Yonekawa<sup>2</sup>, Hitoshi Nagura<sup>1</sup>, Michihiro Tateyama<sup>3</sup>,  
7 Yoshinori Fujiyoshi<sup>1,‡,4</sup> and Katsumasa Irie<sup>1,2</sup>.

8 <sup>1</sup>Cellular and Structural Physiology Institute (CeSPI), and <sup>2</sup>Graduate School of  
9 Pharmaceutical Sciences, Nagoya University, Furo-cho, Chikusa, Nagoya 464-8601,  
10 Japan.

11 <sup>3</sup>Division of Biophysics and Neurobiology, National Institute for Physiological Sciences,  
12 Okazaki, Aichi, 444-8585, Japan

13 <sup>4</sup>CeSPIA Inc., 2-1-1, Otemachi, Chiyoda, Tokyo, 100-0004, Japan

14 ‡present address: Advanced Research Institute, Tokyo Medical and Dental University,  
15 1-5-45 Yushima, Bunkyo-ku, Tokyo 113 - 8510, Japan

16

17 Address correspondence to: Katsumasa Irie, Cellular and Structural Physiology Institute  
18 (CeSPI), Nagoya University, Furo-cho, Chikusa, Nagoya 464-8601, Japan Tel.:  
19 +81-52-747-6838; Fax: +81-52-747-6795; E-mail: kirie@cespi.nagoya-u.ac.jp

20

1 **Abstract**

2 Voltage-dependent  $\text{Ca}^{2+}$  channels (Cavs) are indispensable for coupling action  
3 potentials with  $\text{Ca}^{2+}$  signaling in living organisms. The structure of Cavs is similar to  
4 that of voltage-dependent  $\text{Na}^{+}$  channels (Navs). It is known that prokaryotic Navs can  
5 obtain  $\text{Ca}^{2+}$  selectivity by negative charge mutations of the selectivity filter, but native  
6 prokaryotic Cavs had not yet been identified.

7 Here, we report the first identification of a native prokaryotic Cav, CavMr, and its  
8 relative, NavPp. Although CavMr contains a smaller number of negatively charged  
9 residues in the selectivity filter than artificial prokaryotic Cavs, CavMr exhibits high  
10  $\text{Ca}^{2+}$  selectivity. In contrast, NavPp, which has similar filter sequence to artificial Cavs,  
11 mainly allows  $\text{Na}^{+}$  to permeate. Interestingly, a NavPp mutant whose selectivity filter  
12 was replaced with that of CavMr exhibits high  $\text{Ca}^{2+}$  selectivity. Mutational analyses  
13 revealed that the glycine residue of the CavMr selectivity filter is a determinant for  $\text{Ca}^{2+}$   
14 selectivity. This glycine residue is well conserved among subdomains I and III of  
15 eukaryotic Cavs.

16 These findings provide new insight into the  $\text{Ca}^{2+}$  selectivity mechanism conserved  
17 from prokaryotes to eukaryotes.

18  
19

## 1 **Introduction**

2 Voltage-dependent  $\text{Ca}^{2+}$  channels (Cavs), which couple the membrane voltage with  
3  $\text{Ca}^{2+}$  signaling, regulate some important physiological functions, such as  
4 neurotransmission and muscle contraction (Hille, 2001). The channel subunits of  
5 mammalian Cavs as well as mammalian voltage-dependent  $\text{Na}^+$  channels (Navs) have  
6 24 transmembrane helices (24TM) (Catterall, 2000), and comprise 4 homologous  
7 subdomains with 6 transmembrane helices that correspond to one subunit of  
8 homo-tetrameric channels, such as Kvs and prokaryotic Navs (BacNavs). Comparison  
9 of the sequences between Navs and Cavs indicate that Navs derived from Cavs. Their  
10 two pairs of subdomains, domains I and III, and domains II and IV, are evolutionarily  
11 close to each other (Rahman et al., 2014; Strong et al., 1993). Therefore, the 24TM-type  
12 of Cavs are thought to have evolved from the single-domain type of Cavs with two  
13 times of domain duplications. Although prokaryotes are expected to have such  
14 ancestor-like channels, native prokaryotic Cavs have not yet been identified. The lack of  
15 ancestor-like prokaryotic Cavs is a missing link in the evolution of voltage-dependent  
16 cation channels.

17 In contrast to the lack of prokaryotic Cavs, many BacNavs have been characterized  
18 (Irie et al., 2010; Ito et al., 2004; Koishi et al., 2004; Lee et al., 2012; Nagura et al.,  
19 2010; Ren et al., 2001; Shimomura et al., 2016, 2011). The simple structure of BacNavs  
20 has helped to elucidate the molecular mechanisms of Nav (Irie et al., 2018, 2012; Tsai et  
21 al., 2013; Yue et al., 2002). In addition to this point, BacNavs has been used as the  
22 genetic tool for manipulating the neuronal excitability in vivo (Bando et al., 2014;  
23 Kamiya et al., 2019; Lin et al., 2010). The introduction of a several negatively charged  
24 amino acids into the selectivity filter of BacNavs leads to the acquisition of  $\text{Ca}^{2+}$   
25 selectivity (Tang et al., 2013; Yue et al., 2002). Such a mutant of NavAb (a BacNav  
26 from *Arcobacter butzleri*) showed high  $\text{Ca}^{2+}$  selectivity, and the structural basis of  $\text{Ca}^{2+}$   
27 selectivity has been discussed on the basis of its crystal structures (Tang et al., 2016,  
28 2013). The selectivity filter sequences with a large number of aspartates in CavAb,  
29 which was made by mutations of NavAb, are quite different from those of the original  
30 mammalian Cavs.

31 Here, we newly characterized two BacNav homologues, CavMr from *Meiothermus*  
32 *ruber* and NavPp from *Plesiocystis pacifica*. These two channels are evolutionarily  
33 distant from the previously reported canonical BacNavs. We confirmed that CavMr has  
34 clear  $\text{Ca}^{2+}$  selectivity, and NavPp has  $\text{Na}^+$  selectivity with  $\text{Ca}^{2+}$ -dependent inhibition.  
35 The discovery of these channels suggests the possible importance of voltage-regulated  
36  $\text{Ca}^{2+}$  signaling in prokaryotes and may be a new genetic tool for controlling  $\text{Ca}^{2+}$

1 signaling. Furthermore, mutational analyses indicate that the glycine residue of the  
2 CavMr selectivity filter is important for  $\text{Ca}^{2+}$  selectivity. The glycine residue is also well  
3 conserved in the selectivity filter of the subdomain I and III of mammalian Cavs. On the  
4 basis of these observations, we propose that CavMr is an ancestral-type of native  
5 prokaryotic Cav with a  $\text{Ca}^{2+}$  selectivity mechanism different from that in artificial  
6 CavAb. CavMr and NavPp are expected to advance our understanding of  $\text{Ca}^{2+}$   
7 recognition and the evolution of voltage-dependent cation channels.

8

## 9 **Results**

### 10 **Identification of two prokaryotic channels with $\text{Ca}^{2+}$ permeability and inhibition.**

11 We searched for the primary sequences of prokaryotic Cavs in the GenBank™  
12 database. In mammalian and prokaryotic Navs and Cavs, a larger number of negative  
13 charges in the filter increases  $\text{Ca}^{2+}$  selectivity (Heinemann et al., 1992; Tang et al., 2014;  
14 Yue et al., 2002). Several BLAST search rounds using the pore regions (S5-S6) of  
15 NaChBac (or NavBh; a BacNav from *Bacillus halodurans*) as templates revealed a  
16 series of candidate prokaryotic Cavs (Fig.1a) with a selectivity filter sequence similar to  
17 the “TLESW” motif, but more negatively charged: ZP\_04038264 from *Meiothermus*  
18 *ruber*, ZP\_01909854 from *Plesiocystis pacifica*, YP\_003896792 from *Halomonas*  
19 *elongata*, and YP\_003073405 from *Teredinibacter turnerae* (SI Appendix, Fig.S1a).  
20 These channels belong to a different branch of the phylogenetic tree than that of canonical  
21 BacNavs (Fig.1a) and have some negatively charged residues in their selectivity filter,  
22 similar to CavAb (Fig.1b). In the case of the expression of prokaryotic channels, insect  
23 cells are better than mammalian cells to generate large current amplitudes (Irie et al.,  
24 2018). We therefore transfected Sf9 cells with these genes and measured the resulting  
25 whole-cell currents. Although the cells transfected with genes from *H. elongata* and *T.*  
26 *turnerae* failed to show detectable currents, those from *M. ruber* and *P. pacifica* showed  
27 currents in response to a depolarizing stimulus from a -140 mV holding potential  
28 (Fig.1c and d). To estimate the  $\text{Ca}^{2+}$  permeability, we measured their current-voltage  
29 relationships. The *M. ruber* channel had clearly larger currents in the high- $\text{Ca}^{2+}$  solution  
30 than in the high- $\text{Na}^+$  solution, and very positive reversal potential was observed in a  
31 high- $\text{Ca}^{2+}$  bath solution (Fig.1e). In contrast, the currents derived from the *P. pacifica*  
32 channel increased with increases in the bath  $\text{Na}^+$  concentration and significantly  
33 decreased when the  $\text{Na}^+$  solution was replaced with a high  $\text{Ca}^{2+}$  solution. The reversal  
34 potential fit well to the  $\text{Na}^+$  equilibrium potential in the high- $\text{Na}^+$  solution (Fig.1f).  
35 These current-voltage relationships suggest that the *M. ruber* channel has a preference  
36 for  $\text{Ca}^{2+}$  and the *P. pacifica* channel has a preference for  $\text{Na}^+$ . Therefore, the two newly

- 1 identified channels from *M. ruber* and *P. pacifica* are abbreviated as CavMr and NavPp
- 2 respectively, based on their ion selectivity and species name.

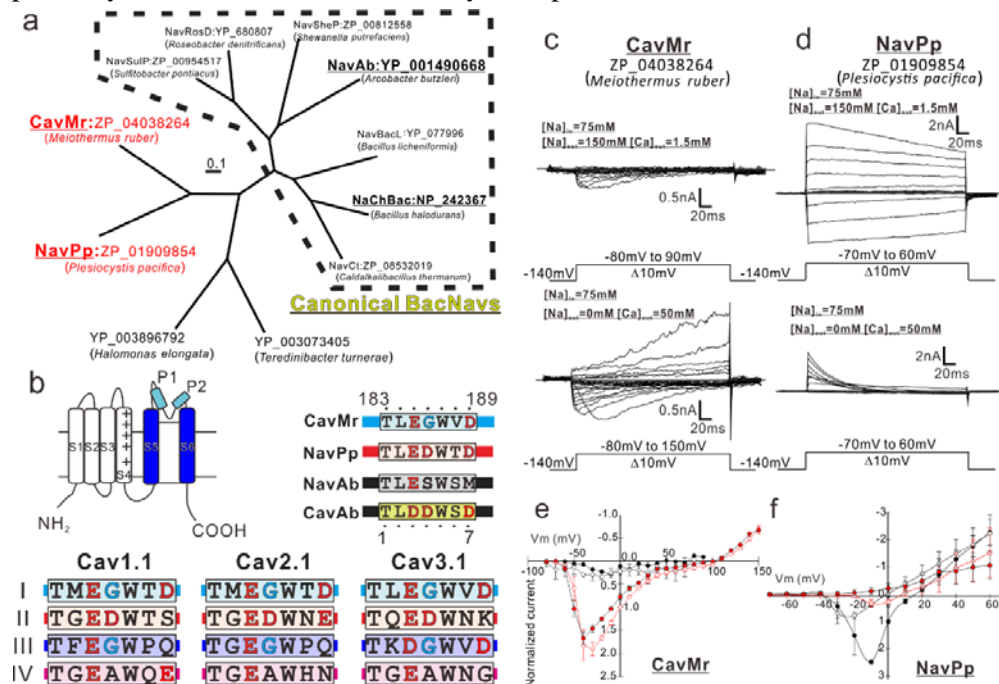

- 3
- 4
- 5
- 6
- 7
- 8
- 9
- 10
- 11
- 12
- 13
- 14
- 15
- 16
- 17
- 18
- 19
- 20
- 21
- 22
- 23
- 24
- 25
- 26
- 27
- 28
- 29
- 30

**Figure 1. Sequence analysis and the representative current recordings of the novel BacNav homologues**

a). Phylogenetic tree of the BacNav homologues with their GenBank™ accession numbers. The ClustalW program was used to align the multiple protein sequences of the BacNav homologues. The phylogenetic tree was generated using “PROTDIST”, one of the PHYLIP package (Phylogeny Inference Package: <http://evolution.genetics.washington.edu/phylip.html>). The branch lengths are proportional to the sequence divergence, with the scale bar corresponding to 0.1 substitution per amino acid position. Four homologues colored that are not included in canonical BacNavs were cloned and expressed to check the current activity. Those of two which are underlined in red and shown as bold generated the detectable currents.

b). Schematic secondary structure and selectivity filter sequence of BacNavs and human Cavs. Cylinder indicates  $\alpha$ -helix. The selectivity filter sequences are indicated by alphabetical characters. Negatively charged residues are colored by red. Glycine residues in the position 4 are colored by cyan. The straight lines indicate the other part of pore domain. The selectivity filter sequence of hCav1.1 (UniProt ID: Q13698), hCav2.1 (O00555) and hCav3.1 (O43497), were used.

c and d). Representative current traces to obtain the current-voltage relationships of CavMr (c) and NavPp (d) in Sf9 cells. The straight lines indicating the zero-current level in the representative current traces. Currents were generated under the bath solutions containing high Na<sup>+</sup> (top) and high Ca<sup>2+</sup> (middle), by a series of step-pulses shown in bottom.

e and f). Current-voltage relationships of CavMr (e) and NavPp (f) measured under the different bath solutions (filled black; 150 mM NaCl, open black; 75 mM NaCl and 75 mM NMDG-HCl, open red; 75 mM NaCl and 50 mM CaCl<sub>2</sub>, filled red; 50 mM CaCl<sub>2</sub> and 75 mM NMDG-HCl). Currents of CavMr and NavPp were normalized to that by 0mV depolarization stimuli under 75 mM NaCl and 50 mM CaCl<sub>2</sub> bath solution and 150 mM NaCl bath solution, respectively.

1  
 2 To clearly compare the positions of the residues in the selectivity filter in each channel,  
 3 we renumbered the seven residues comprising the selectivity filter in the following  
 4 description. For example, the seven residues of the CavMr selectivity filter are  
 5 183-TLEGWVD-189, and thus Thr183 and Asp189 were renumbered to Thr1 and Asp7  
 6 (Fig.1b). Notably, the amino acid sequence of the selectivity filter in CavMr is similar to  
 7 the conserved features of domains I/III in mammalian Caves, a glycine at position 4 and  
 8 a polar or negatively charged residue at position 7 (Fig.1b), which are not observed in  
 9 the BacNav family. In addition, its sequence is quite similar to that of the human Cav  
 10 subdomain I, or even the same as Cav3.1 and 3.2 (Fig.1b).

11 In the following experiments, to accurately evaluate the reversal potential for the ion  
 12 selectivity analysis, we introduced a single mutation that resulted in large and  
 13 long-lasting channel currents. T220A and G229A mutations in NaChBac led to slower  
 14 inactivation, indicating suppression of the transition to the inactivated state (Irie et al.,  
 15 2010; Shimomura et al., 2016). We introduced a T232A mutation to NavPp and a  
 16 G240A mutation to CavMr, corresponding to the NaChBac mutations of T220A and  
 17 G229A, respectively. These mutants stably showed measurable currents, even after they  
 18 were administered multiple depolarizing stimuli (*SI Appendix*, Fig.S1b-e).

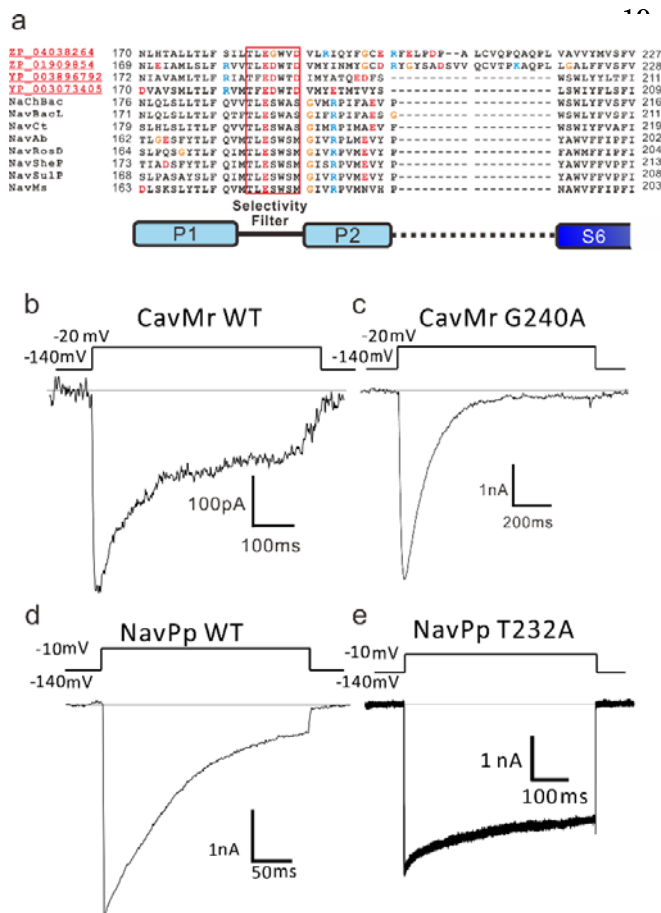

**Fig. S1. NavPp T232A and CavMr G240A mutants suppress inactivation**

a). Alignment of the deduced amino acid sequences of P1 helix to P2 helix domain of novel cloned homologies with well characterized BacNavs. b) and c). Whole-cell current in CavMr wild type (WT; b) and a G240A mutant (c) when the pulse of -20 mV was given for 500 ms and 1sec, respectively. d) and e). Whole-cell recording of NavPp wild type (WT; d) and NavPp T232A mutant (e) when the pulse of -10 mV was given for 250 ms and 500ms, respectively.

1

2

3 **CavMr has high  $\text{Ca}^{2+}$  selectivity over  $\text{Na}^+$ .**

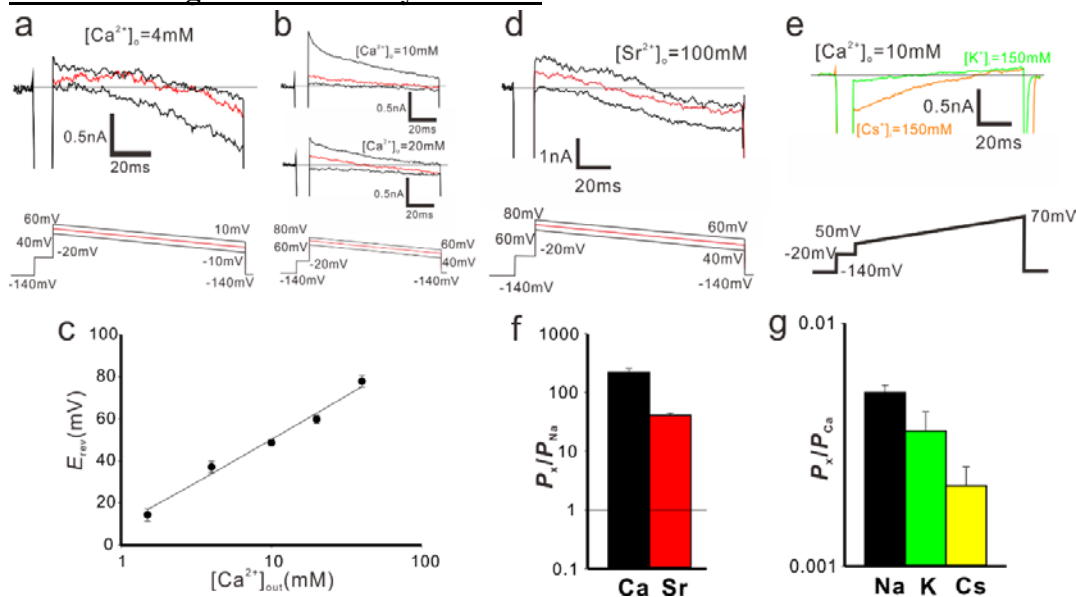

4

5 **Figure 2. Cation selectivity of CavMr**

6

7

8

9

10

11

12

13

14

15

16

17

18

19

20

21

22

23

24

25

26

27

28

29

30

a and b). Recordings of the reversal potential of CavMr currents using the ramp protocol. Currents were generated by the step pulse of -20 mV from -140 mV holding potential, followed by the ramp pulses with different voltage values (shown at the bottom of panels a and b). The values of the reversal potential recorded with three different ramp pulses were averaged. Currents were measured under the bath solution containing 4 mM (a) and 10 and 20 mM (b)  $\text{CaCl}_2$  and the pipette solution with 150 mM  $\text{NaCl}$ . c). The plot of the reversal potential to the bath  $[\text{Ca}^{2+}]_{\text{out}}$ . Each value was obtained using the protocol shown in a and b. The relationship was fitted by a line with the slope of  $41.07 \pm 2.64$  mV per decade ( $n = 4$ ). d). Representative current traces to obtain the reversal potential under the condition of 100 mM  $[\text{Sr}^{2+}]_{\text{out}}$  and 150 mM  $[\text{Na}^+]_{\text{in}}$ . Currents were generated by the protocol shown in the lower part. e). Representative current traces to investigate the  $P_{\text{Cs}}/P_{\text{Ca}}$  and  $P_{\text{K}}/P_{\text{Ca}}$ , the pipette solutions contained 150 mM  $[\text{Cs}^+]_{\text{in}}$  for  $P_{\text{Cs}}/P_{\text{Ca}}$  and 150 mM  $[\text{K}^+]_{\text{in}}$  for  $P_{\text{K}}/P_{\text{Ca}}$ , while the bath solution contained 10 mM  $[\text{Ca}^{2+}]_{\text{out}}$  in both cases. f). The relative permeability of  $\text{Ca}^{2+}$  or  $\text{Sr}^{2+}$  to  $\text{Na}^+$  in CavMr, calculated from the reversal potential that was obtained in a, b, and d. g). The relative permeability of each monovalent cation to  $\text{Ca}^{2+}$  in CavMr, derived from the data shown in e.

We accurately quantified the selectivity of CavMr for  $\text{Na}^+$  and  $\text{Ca}^{2+}$  ( $P_{\text{Ca}}/P_{\text{Na}}$ ) by measuring the reversal potential under bi-ionic conditions, in which the  $\text{Ca}^{2+}$  concentration in the bath solution was changed to 1.5, 4, 10, 20, and 40 mM while the intracellular  $\text{Na}^+$  concentration was held constant at 150 mM (Fig.2a and b). The plot of the reversal potentials as a function of  $[\text{Ca}^{2+}]$  had a slope of  $41.07 \pm 2.64$  mV /decade ( $n = 4$ ), a value close to that for  $\text{Ca}^{2+}$  (Fig. 2c), and indicated that CavMr had a  $P_{\text{Ca}}/P_{\text{Na}}$  of  $218 \pm 38$  (Fig.2a and b, Table1). This high  $P_{\text{Ca}}/P_{\text{Na}}$  value is comparable to that of CavAb. Among several species of cations, including  $\text{Sr}^{2+}$ ,  $\text{K}^+$ , and  $\text{Cs}^+$  (Fig.2d and e),  $\text{Ca}^{2+}$  had

1 the highest permeability relative to  $\text{Na}^+$  (Fig.2f and g, Table1). On the basis of these  
 2 results, CavMr was confirmed to be a native prokaryotic Cav with high  $\text{Ca}^{2+}$  selectivity.  
 3 We also investigated whether CavMr shows the typical anomalous mole fraction effect  
 4 (Almers and McCleskey, 1984) and the non-monotonic mole fraction effect observed in  
 5 NaChBac (Finol-Urdaneta et al., 2014). CavMr did not allow  $\text{Na}^+$  permeation under  
 6  $\text{Ca}^{2+}$ -free (0 mM  $\text{CaCl}_2$  and 1 mM EGTA) conditions (*SI Appendix*, Fig. S2a and b).  
 7 Also, different from the recording of NaChBac currents in a solution containing  $\text{Na}^+$  and  
 8  $\text{K}^+$ , CavMr had an apparently monotonic current increase depending on the  $\text{Ca}^{2+}$  mole  
 9 fraction to  $\text{Na}^+$  (*SI Appendix*, Fig. S2c and d).

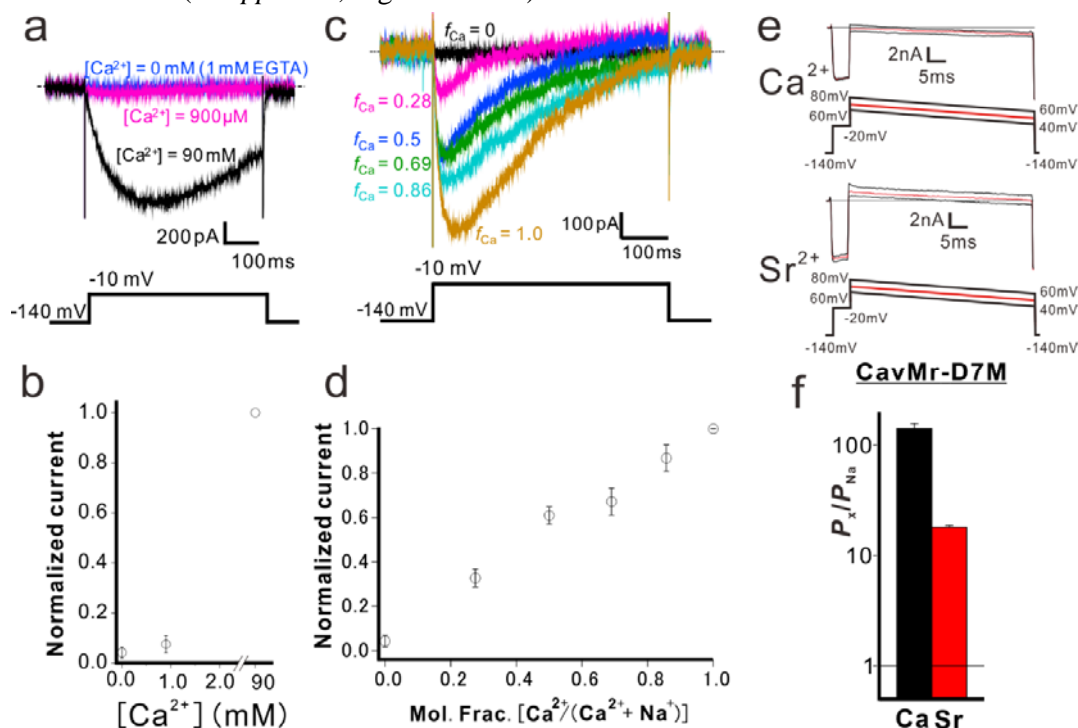

**Fig. S2. The characterization of the selectivity filter of CavMr**

12 a). No observation of anomalous mole fraction effects in CavMr. CavMr currents  
 13 were recorded in the bath solution containing the following concentration of  $\text{Na}^+$  and  
 14  $\text{Ca}^{2+}$ ;  $[\text{Na}^+]: [\text{Ca}^{2+}]$  is 0:90, 133.7:0.9, 135:0 (mM), respectively. The 0 mM  $\text{Ca}^{2+}$   
 15 solution also contains 1 mM EGTA. b). The plot of the normalized current amplitude  
 16 of CavMr obtained from a. c). Representative current traces of CavMr under different  
 17 mole fraction of  $\text{Ca}^{2+}$ .  $f_{\text{Ca}}$  indicates  $[\text{Ca}^{2+}]_{\text{out}} / ([\text{Ca}^{2+}]_{\text{out}} + [\text{Na}^+]_{\text{out}})$ . d). The plot of the  
 18 normalized current amplitude to each mole fraction, as measured in c. e). For the  
 19 evaluation of the relative permeability of  $\text{Ca}^{2+}$  and  $\text{Sr}^{2+}$  to  $\text{Na}^+$  of CavMr-D7M, Ca  
 20 solution (100mM  $\text{CaCl}_2$ , 10mM HEPES (pH 7.4 adjusted with  $\text{Ca}(\text{OH})_2$ ) and 10 mM  
 21 glucose) and Sr solution (100 mM  $\text{SrCl}_2$  10 mM HEPES (pH 7.4 adjusted by  $\text{Sr}(\text{OH})_2$ )  
 22 and 10 mM glucose) were used as bath solution, respectively. High Na pipette solution  
 23 (115 mM NaF, 35 mM NaCl, 10 mM EGTA, and 10 mM HEPES (pH 7.4 adjusted by  
 24 NaOH)) was used. Currents were generated by the step pulse of -20 mV from -140 mV  
 25 holding potential, followed by the ramp pulses with different voltage values. The time  
 26 courses of the membrane potentials were shown at the bottom of each current traces. f)  
 27 The relative permeability of divalent cation to  $\text{Na}^+$  in the CavMr-D7M, whose position



1       6 residue of the selectivity filter was neutralized by the corresponding residue of  
 2       NavAb.  
 3       Studies of an artificial Cav, CavAb, revealed that Ca<sup>2+</sup> selectivity depends on a large  
 4       number of aspartates in the filter sequence (Tang et al., 2013). The high Ca<sup>2+</sup> selectivity  
 5       in CavMr was unexpected because the filter sequence contained only one aspartate  
 6       residue (Fig.1b). Furthermore, CavMr-D7M, which has only one negatively charged  
 7       residue in the selectivity filter “TLEGWVM”, still had high Ca<sup>2+</sup> selectivity comparable  
 8       to that of wild-type CavMr ( $P_{Ca}/P_{Na} = 144 \pm 12$ ; *SI Appendix*, Fig. S2e and f and Table1).  
 9       These findings indicate that CavMr and artificial CavAb have different Ca<sup>2+</sup> selective  
 10      mechanisms.

|             | $P_{Ca}/P_{Na}$         | $P_{Sr}/P_{Na}$        | $P_{K}/P_{Na}$                         | $P_{Cs}/P_{Na}$                        |
|-------------|-------------------------|------------------------|----------------------------------------|----------------------------------------|
| CavMr G240A | 218 ± 38<br>(n= 20 )    | 40.6 ± 3.4<br>(n= 6 )  | 0.0036±0.00072 <sup>a</sup><br>(n= 4 ) | 0.0021±0.00042 <sup>b</sup><br>(n= 4 ) |
| Pp          | 13.8 ± 2.0<br>(n= 7 )   | 24.5 ± 0.3<br>(n= 5 )  | 0.95 ± 0.04<br>(n= 4 )                 | 0.57 ± 0.05<br>(n= 3 )                 |
| G4D         | 7.73 ± 2.24<br>(n= 11 ) | 18.6 ± 6.1<br>(n= 4 )  | 1.20 ± 0.28<br>(n= 4 )                 | 0.87 ± 0.21<br>(n= 4 )                 |
| G4S         | 11.9 ± 1.5<br>(n= 5 )   | 4.23 ± 0.27<br>(n= 5 ) | 1.54 ± 0.12<br>(n= 5 )                 | 2.02 ± 0.48<br>(n= 3 )                 |
| V6T         | 40.1 ± 9.7<br>(n= 5 )   | 13.3 ± 2.5<br>(n= 5 )  | 0.69 ± 0.26<br>(n= 3 )                 | 0.54 ± 0.60<br>(n= 3 )                 |
| D7M         | 144 ± 12<br>(n= 5 )     | 20.7 ± 2.7<br>(n= 5 )  | N.D.                                   | N.D.                                   |
| NavPp T232A | 0.308±0.028<br>(n= 10 ) | 0.38±0.027<br>(n= 9 )  | 0.16±0.026<br>(n= 9 )                  | 0.0052±0.0006<br>(n= 7 )               |
| Mr          | 215 ± 33<br>(n= 7 )     | 86.3 ± 12.2<br>(n= 4 ) | 0.0045±0.00072 <sup>a</sup><br>(n= 4 ) | 0.0135±0.0039 <sup>b</sup><br>(n= 9 )  |
| D4G         | 41.4 ± 6.7<br>(n= 10 )  | 8.85 ± 0.95<br>(n= 4 ) | << 0.01<br>(n= 3 )                     | << 0.01<br>(n= 4 )                     |
| D4S         | 1.49 ± 0.18<br>(n= 6 )  | 0.47 ± 0.08<br>(n= 6 ) | 0.24 ± 0.01<br>(n= 4 )                 | 0.11 ± 0.02<br>(n= 3 )                 |
| T6V         | 1.72 ± 0.19<br>(n= 10 ) | 33.9 ± 5.0<br>(n= 8 )  | 0.99 ± 0.03<br>(n= 4 )                 | 0.84 ± 0.02<br>(n= 4 )                 |

11 **Table1. Relative permeability of CavMr and NavPp**

12 <sup>a</sup> Because of high Ca<sup>2+</sup> selectivity,  $P_{K}/P_{Ca}$  were indicated

13 <sup>b</sup> Because of high Ca<sup>2+</sup> selectivity,  $P_{Cs}/P_{Ca}$  were indicated

1

2 **NavPp is permeable to Na<sup>+</sup> and is blocked by extracellular Ca<sup>2+</sup>.**

3 The current-voltage relationships of NavPp revealed a preference for Na<sup>+</sup> (Fig.1d and  
 4 f). Interestingly, NavPp, although having one more aspartate in the selectivity filter than  
 5 CavMr, exhibited larger currents in Na<sup>+</sup> solutions than in Ca<sup>2+</sup> solutions (Fig.1b and d).  
 6 Recordings in bath solution containing both Na<sup>+</sup> and Ca<sup>2+</sup> demonstrated that increasing  
 7 the extracellular Ca<sup>2+</sup> decreased the current in NavPp and led to a positive shift in the  
 8 voltage dependence, indicating that a higher concentration of Ca<sup>2+</sup> inhibited NavPp  
 9 (Fig.1f and Fig. 3a and *SI Appendix*, Fig. S3a). With NavAb, increasing the Ca<sup>2+</sup>  
 10 concentration with a constant Na<sup>+</sup> concentration in the bath solution led to a small  
 11 increase in the current amplitude, probably due in part to Ca<sup>2+</sup> permeability (Fig. 3a and  
 12 *SI Appendix*, Fig. S3b). We also investigated the dependence of the direction of current  
 13 flow on Ca<sup>2+</sup> inhibition by comparing pipette solutions containing 10 mM or 150 mM  
 14 Na<sup>+</sup>, in which the current flowed in an inward or outward direction, respectively, even  
 15 under the same -10 mV depolarizing stimulus (Fig. 3a and *SI Appendix*, Fig. S3a and  
 16 c). The results demonstrated that the inhibitory effects of Ca<sup>2+</sup> on NavPp were  
 17 independent of the current direction.

18

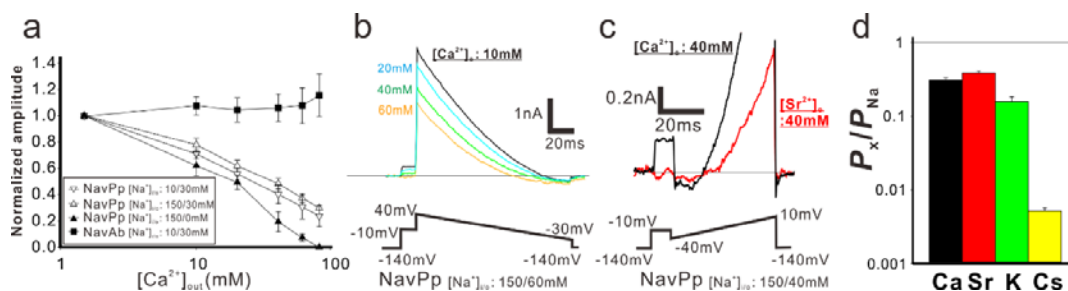

19

20 **Figure 3. Na<sup>+</sup> permeability and the extracellular Ca<sup>2+</sup>-dependent inhibition in NavPp**

21

22 a) [Ca<sup>2+</sup>]<sub>out</sub> dependent inhibitory effects in NavPp. Currents were normalized to those

23

24 under 1.5 mM [Ca<sup>2+</sup>]<sub>out</sub> (filled square; NavAb current in the 30 mM [Na<sup>+</sup>]<sub>out</sub> and 10 mM

25

26 [Na<sup>+</sup>]<sub>in</sub> (representative data are shown in Fig. S3b), open triangle down; NavPp inward

27

28 current in the 30 mM [Na<sup>+</sup>]<sub>out</sub> and 10 mM [Na<sup>+</sup>]<sub>in</sub> (Fig. S3a), open triangle up; NavPp

29

30 outward current in the 30 mM [Na<sup>+</sup>]<sub>out</sub> and 150 mM [Na<sup>+</sup>]<sub>in</sub> (Fig. S3c), filled triangle

31

32 up; NavPp outward current in the 0 mM [Na<sup>+</sup>]<sub>out</sub> and 150 mM [Na<sup>+</sup>]<sub>in</sub>. b).

33

34 Representative currents to obtain the reversal potential in NavPp for P<sub>Ca</sub>/P<sub>Na</sub>. Currents

35

36 were generated by the ramp protocol shown in bottom. [Ca<sup>2+</sup>]<sub>out</sub> was varied from 10 to

60 mM with the fixed [Na<sup>+</sup>] both in the bath (60mM) and pipette (150mM). c).

Representative currents to obtain the reversal potential in NavPp for P<sub>Sr</sub>/P<sub>Na</sub>. Currents

were generated by the ramp protocol shown in bottom. [Sr<sup>2+</sup>]<sub>out</sub> was 40 mM with the

fixed [Na<sup>+</sup>] both in the bath (40mM) and pipette (150mM). d). The relative

permeability of different cation species to Na<sup>+</sup> in NavPp, calculated from the reversal

potential that was obtained in b, c and Fig.S3d and e.

36

We then compared the relative permeability of various cations with that of Na<sup>+</sup> in

1 NavPp. In bi-ionic conditions with high concentration of  $\text{Ca}^{2+}$  in the bath and high  $\text{Na}^+$   
 2 in the pipette, the outward current was completely blocked by  $\text{Ca}^{2+}$  (Fig. 3a), and the  
 3 inward current was hardly observed. The reversal potential was obtained under an  
 4 extracellular solution containing  $\text{Na}^+$  ions, however, despite a partial  $\text{Ca}^{2+}$  or  
 5  $\text{Sr}^{2+}$ -induced block (Fig. 3b and c). The selectivity of NavPp was higher for  $\text{Na}^+$  than for  
 6  $\text{Ca}^{2+}$ ,  $\text{Sr}^{2+}$ ,  $\text{K}^+$ , and  $\text{Cs}^+$  (Fig. 3d and *SI Appendix*, Fig. S3d and e). The  $P_{\text{Ca}}/P_{\text{Na}}$  was  
 7  $0.308 \pm 0.028$  in a bath solution containing both  $\text{Ca}^{2+}$  and  $\text{Na}^+$ , suggesting that a larger  
 8 fraction of  $\text{Ca}^{2+}$  is allowed to permeate with outside  $\text{Na}^+$  ions through NavPp than  
 9 through canonical BacNavs. Similar to  $\text{Ca}^{2+}$ ,  $\text{Sr}^{2+}$  also blocked the NavPp current, but  
 10 may also permeate the channel along with  $\text{Na}^+$  ions (Fig. 3c). These findings  
 11 demonstrate a unique feature of NavPp, a low affinity  $\text{Ca}^{2+}$  block, which is not reported  
 12 in canonical BacNavs.

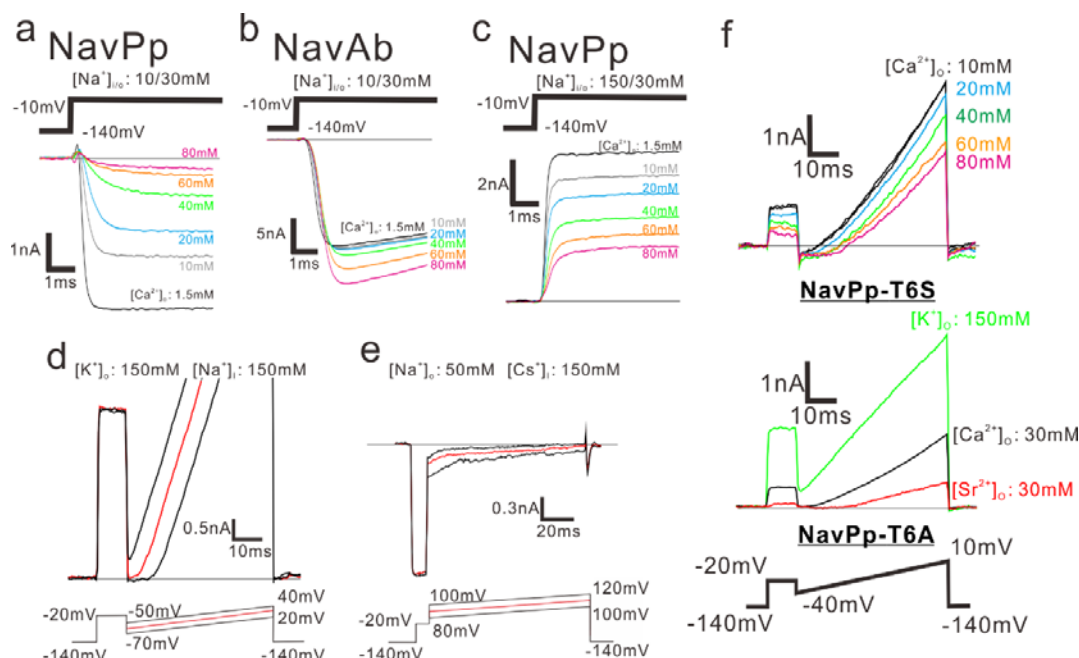

13

14

15

16

17

18

19

20

21

22

23

24

25

26

27

**Fig. S3. The characterization of the selectivity filter of NavPp**

a) and b) NavPp and NavAb currents generated by the step pulses from -140 mV holding potential to -10 mV under the various  $[\text{Ca}^{2+}]_{\text{out}}$  ranging from 1.5 to 80 mM. Inward currents are observed in the 30 mM  $[\text{Na}^+]_{\text{out}}$  and 10 mM  $[\text{Na}^+]_{\text{in}}$ . c) NavPp currents generated by the same pulse protocol under various  $[\text{Ca}^{2+}]_{\text{out}}$ . Outward currents are observed in the 30 mM  $[\text{Na}^+]_{\text{out}}$  and 150 mM  $[\text{Na}^+]_{\text{in}}$ . d and e) For the evaluation of the relative permeability of  $\text{K}^+$  and  $\text{Cs}^+$  to  $\text{Na}^+$  of NavPp, K solution (150 mM KCl, 2mM  $\text{CaCl}_2$  10 mM HEPES (pH 7.4 adjusted by KOH) and 10 mM glucose) and low Na solution (50 mM NaCl, 100mM NMDG-HCl, 2mM  $\text{CaCl}_2$  10 mM HEPES (pH 7.4 adjusted by NaOH) and 10 mM glucose) were used as bath solution, respectively. High Na pipette solution (115 mM NaF, 35 mM NaCl, 10 mM EGTA, and 10 mM HEPES (pH 7.4 adjusted by NaOH)) and Cs pipette solution (115 mM CsF, 35 mM CsCl, 10 mM EGTA, and 10 mM HEPES (pH 7.4 adjusted by CsOH)) were used for  $\text{K}^+$  and  $\text{Cs}^+$  selectivity, respectively. Currents were generated by the step pulse

1 of -20 mV from -140 mV holding potential, followed by the ramp pulses with different  
 2 voltage values. The time courses of the membrane potentials were shown at the  
 3 bottom of each current traces. f) The relative permeability of each cation species to  
 4  $\text{Na}^+$  in the single-point mutants of NavPp. The selectivity filter of NavPp was changed  
 5 to the  $\text{Ca}^{2+}$ -selective canonical-BacNavs mutants (T6S; TLEDWSD and T6A;  
 6 TLEDWAD).  
 7 Interestingly, the filter sequence of NavPp, "TLEDWTD", has three  
 8 negatively-charged residues, similar to the filter sequences of the artificial  
 9  $\text{Ca}^{2+}$ -selective BacNav mutants ( "TLEDWSD" mutant of NavAb and "TLEDWAD"  
 10 mutant of NaChBac ) (Tang et al., 2013; Yue et al., 2002). NavPp does not show  $\text{Ca}^{2+}$   
 11 permeability, however, but rather a  $\text{Ca}^{2+}$  block. We also investigated NavPp mutants  
 12 with the same filter sequences as the artificial Cavs. NavPp-T6S "TLEDWSD"  
 13 exhibited  $\text{Ca}^{2+}$ -blocked currents similar to wild-type NavPp (*SI Appendix*, Fig. S3f).  
 14 Further, NavPp-T6A "TLEDWAD" showed no inward current in bath solutions  
 15 containing divalent cations, suggesting that the  $\text{Ca}^{2+}$ -induced block was enforced.  
 16 Therefore, both of the selectivity filter sequences providing  $\text{Ca}^{2+}$  selectivity to canonical  
 17 BacNavs failed to generate  $\text{Ca}^{2+}$ -permeable NavPp, indicating that the cation permeable  
 18 mechanism of NavPp differs from that of canonical BacNavs, as well as that of CavMr.

19

20 **Swapping the filter regions between CavMr and NavPp revealed the importance of**  
 21 **the glycine residue at position 4 for  $\text{Ca}^{2+}$  selective permeation.**

22

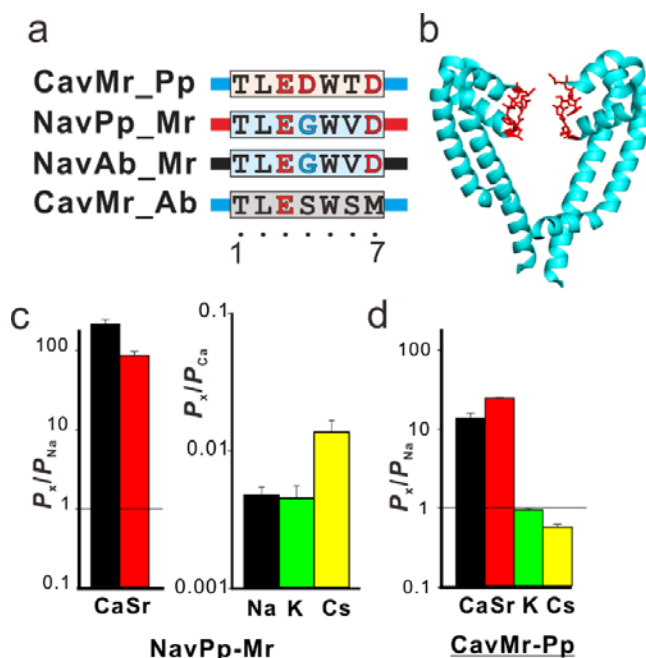

23 **Figure 4. The cation selectivity of the swapping mutant channels in their selectivity filter**  
 24 **between CavMr and NavPp**

1 a) Amino acid sequences of the selectivity filter in the swapped mutants, CavMr-Pp, NavPp,  
 2 NavAb\_Mr, and CavMr\_Ab. The selectivity filter sequences of CavMr, and NavPp, and NavAb  
 3 are indicated by alphabetical characters with cyan, red, and gray shade, respectively. Negatively  
 4 charged residues are colored by red. Glycine residues are colored by cyan. The straight lines of  
 5 cyan, red, and black indicates the other part of pore domain of CavMr, NavPp, and NavAb,  
 6 respectively. b) Pore domains of crystal structure of NavAb (PDB code:5YUA). The selectivity  
 7 filter, which corresponds to the sequences shown in a, was indicated in red. c) The relative  
 8 permeability of divalent cations to  $\text{Na}^+$  (left) and that of monovalent cations to  $\text{Ca}^{2+}$  (right) in  
 9 NavPp-Mr. d) The relative permeability of different cation species to  $\text{Na}^+$  in CavMr-Pp.

10

11 To search for the determinants of  $\text{Ca}^{2+}$  selectivity in CavMr, we investigated a series of  
 12 mutants in which the filter regions were swapped between CavMr and NavPp (Fig.4a  
 13 and b). The mutants with filter sequences swapped between NavPp and CavMr  
 14 exhibited channel activity (*SI Appendix*, Fig. S4). A NavPp mutant whose selectivity  
 15 filter was replaced with that of CavMr, named NavPp-Mr, exhibited much higher  $\text{Ca}^{2+}$   
 16 selectivity ( $P_{\text{Ca}}/P_{\text{Na}} = 215 \pm 33$ ) as well as high  $\text{Sr}^{2+}$  selectivity, comparable to that of  
 17 CavMr (Fig. 4c). In addition, NavPp-Mr excluded  $\text{Cs}^+$  similar to CavMr, but weakly  
 18 allowed  $\text{K}^+$  permeation in contrast to CavMr. On the other hand, a CavMr mutant whose  
 19 selectivity filter was replaced with that of NavPp (CavMr-Pp) almost lost its  $\text{Ca}^{2+}$   
 20 selectivity ( $P_{\text{Ca}}/P_{\text{Na}} = 13.8 \pm 2.0$ ), and was less able to discriminate  $\text{Cs}^+$  and  $\text{K}^+$  from  
 21  $\text{Na}^+$  (Fig. 4d). That is, CavMr-Pp was a more non-selective channel than the wild-type  
 22 CavMr, rather than a  $\text{Na}^+$ -selective channel. Namely, the  $\text{Ca}^{2+}$  selectivity (from NavPp  
 23 to CavMr) was almost transferable, but the  $\text{Na}^+$  selectivity was not. We also investigated  
 24 the full swapping of the filter sequences between CavMr and NavAb (Fig. 4a), but  
 25 neither swapped mutant of CavMr and NavAb had detectable currents. This finding  
 26 suggested that CavMr and NavAb achieve cation selectivity by different structural  
 27 backbones and mechanisms.

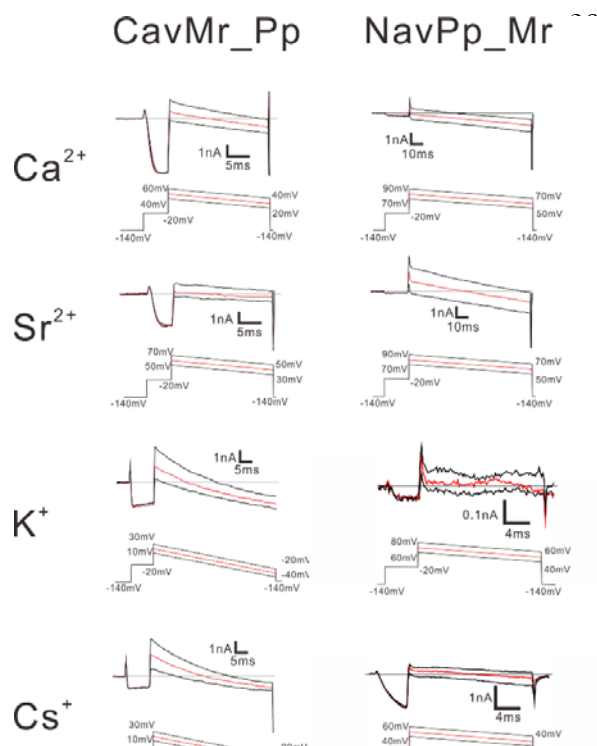

**Fig. S4. Representative current traces of the ramp pulse of selectivity filter-swapped mutants, CavMr\_Pp and NavPp\_Mr**

For the evaluation of the relative permeability of  $\text{Ca}^{2+}$ ,  $\text{Sr}^{2+}$ ,  $\text{K}^+$  and  $\text{Cs}^+$  to  $\text{Na}^+$ , Ca solution (100mM  $\text{CaCl}_2$ , 10mM HEPES (pH 7.4 adjusted with  $\text{Ca}(\text{OH})_2$ ) and 10 mM glucose), Sr solution (100 mM  $\text{SrCl}_2$ , 10 mM HEPES (pH 7.4 adjusted by  $\text{Sr}(\text{OH})_2$ ) and 10 mM glucose), K solution (150 mM KCl, 2mM  $\text{CaCl}_2$ , 10 mM HEPES (pH 7.4 adjusted by KOH) and 10 mM glucose) and Cs solution (150 mM  $\text{CsCl}$ , 2mM  $\text{CaCl}_2$ , 10 mM HEPES (pH 7.4 adjusted by  $\text{CsOH}$ ) and 10 mM glucose) were used as bath solution, respectively. High Na pipette solution (115 mM NaF, 35 mM NaCl, 10 mM EGTA and

1 10 mM HEPES (pH 7.4 adjusted by NaOH)) was used. In the case of NavPp-Mr, the relative  
 2 permeability of  $K^+$  and  $Cs^+$  to  $Ca^{2+}$  were evaluated in behalf of the relative permeability to  $Na^+$   
 3 because of high Ca selectivity of NavPp-Mr. For the evaluation, high K pipette solution (115  
 4 mM KF, 35 mM KCl, 10 mM EGTA and 10 mM HEPES (pH 7.4 adjusted by KOH)) and high  
 5 Cs pipette solution (115 mM CsF, 35 mM CsCl, 10 mM EGTA and 10 mM HEPES (pH 7.4  
 6 adjusted by CsOH)) were used. As bath solution, Ca solution (100mM  $CaCl_2$ , 10mM HEPES  
 7 (pH 7.4 adjusted with  $Ca(OH)_2$ ) and 10 mM glucose was used. Currents were generated by the  
 8 step pulse of -20 mV from -140 mV holding potential, followed by the ramp pulses with  
 9 different voltage values. The time courses of the membrane potentials were shown at the bottom  
 10 of each current traces.

11

12 Positions 4 and/or 6 of the filter sequences are thought to be important for  
 13  $Ca^{2+}$ -selective permeation in NavPp-Mr and CavMr, because only these two positions  
 14 were mutated in the swapping experiments. We investigated which of the mutations in  
 15 positions 4 and 6 had greater effects on the loss of and acquisition of  $Ca^{2+}$  selectivity in  
 16 CavMr and NavPp, respectively. In CavMr, both of two single mutants, CavMr-G4D  
 17 and CavMr-V6T, decreased  $Ca^{2+}$  selectivity and allowed  $K^+$  and  $Cs^+$  permeation (Fig. 5a,  
 18 *SI Appendix*, Fig.S5). Especially, the mutational effect was greater in CavMr-G4D,  
 19 whose  $P_{Ca}/P_{Na}$  was less than 10 ( $7.73 \pm 2.24$ ). CavMr-G4S, in which Gly4 was replaced  
 20 with the Ser4 of NavAb, also exhibited lower  $Ca^{2+}$  selectivity ( $P_{Ca}/P_{Na} = 11.9 \pm 1.5$ ) and  
 21 was also  $K^+$  and  $Cs^+$  permeable, indicating that even a minor substitution by serine is  
 22 not tolerable and does not allow for the selection of specific cations (Fig. 5b, Table1,  
 23 and *SI Appendix*, Fig. S6). In the case of NavPp, NavPp-D4G acquired  $Ca^{2+}$  selectivity  
 24 over  $Na^+$ , and also showed a greater exclusion to  $K^+$  and  $Cs^+$  than wild-type NavPp (Fig.  
 25 5c and *SI Appendix*, Fig.S5). In contrast, NavPp-T6V failed to acquire the high  $Ca^{2+}$   
 26 selectivity ( $P_{Ca}/P_{Na} = 1.72 \pm 1.09$ ) and also allowed  $K^+$  and  $Cs^+$  permeation, while it had  
 27 relatively high  $Sr^{2+}$  selectivity. These results indicate that, in both CavMr and NavPp, a  
 28 glycine residue at position 4 is a key determinant for  $Ca^{2+}$  selectivity. It is noteworthy  
 29 that the glycine is a conserved residue at position 4 of subdomains I and III in all  
 30 subtypes of mammalian Cavs (Fig.1b).

31

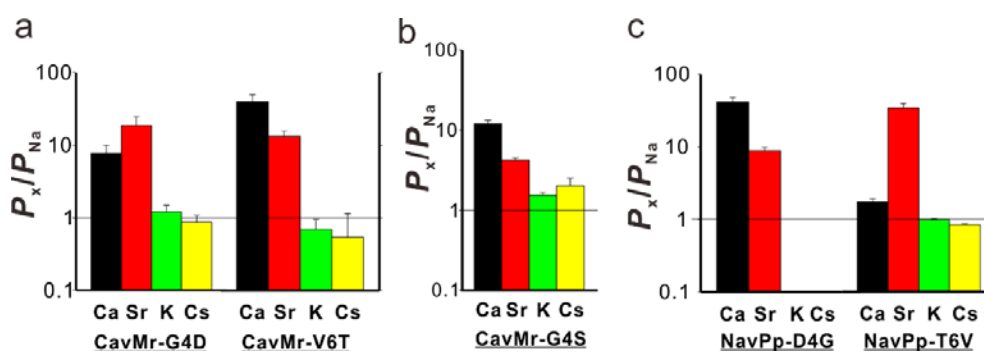

32

33

**Figure 5. The single point mutations losing and obtaining  $Ca^{2+}$  selectivity of CavMr and NavPp, respectively.**

1 a) The relative permeability of each cation species to Na<sup>+</sup> in the single-point mutants  
2 of CavMr. The selectivity filter of CavMr was changed to the corresponding residues  
3 of NavPp at position 4 (G4D) and position 6 (V6T), respectively b) The relative  
4 permeability of each cation species to Na<sup>+</sup> in the G4S mutants of CavMr, whose  
5 position 4 residue of the selectivity filter was mutated to the corresponding residue of  
6 canonical BacNavs. c) The relative permeability of each cation species to Na<sup>+</sup> in  
7 the single-point mutants of NavPp. The selectivity filter of NavPp was changed to the  
8 corresponding residues of CavMr at position 4 (D4G) and position 6 (T6V),  
9 respectively.  
10

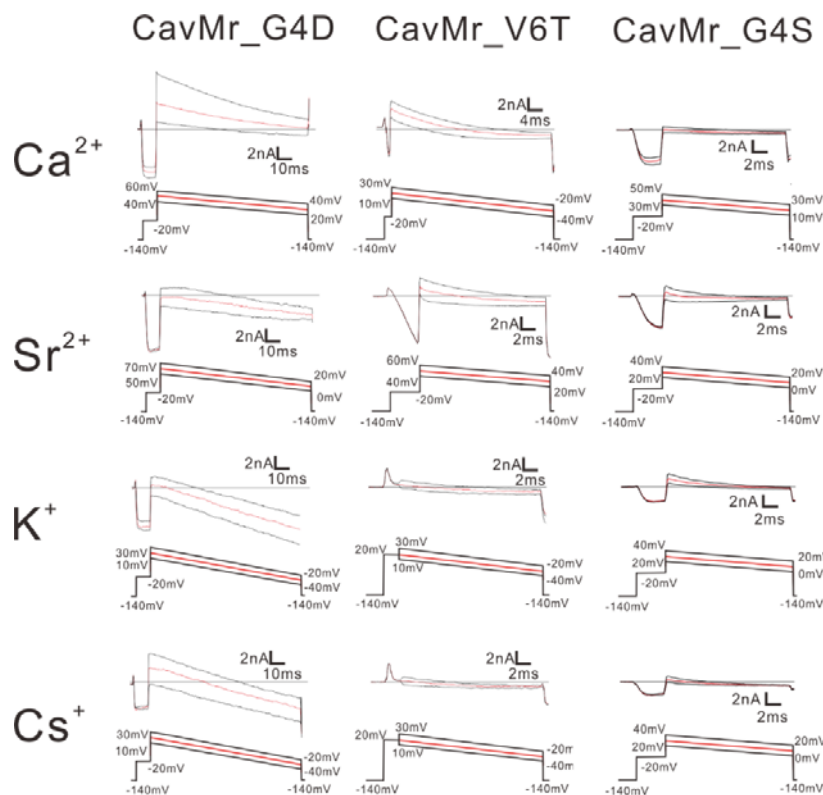

11 **Fig. S5. Representative current traces of the ramp pulse of single point-swapped**  
12 **mutants between CavMr**

13 To evaluate the relative permeability of Ca<sup>2+</sup>, Sr<sup>2+</sup>, K<sup>+</sup> and Cs<sup>+</sup> to Na<sup>+</sup>, Ca solution, Sr  
14 solution, K solution and Cs solution were used as the bath solution, respectively. High  
15 Na pipette solution was used as the pipette solution. The solution contents were  
16 described in material method and Fig. S4. The time courses of the membrane  
17 potentials were shown at the bottom of each current traces.

18  
19  
20

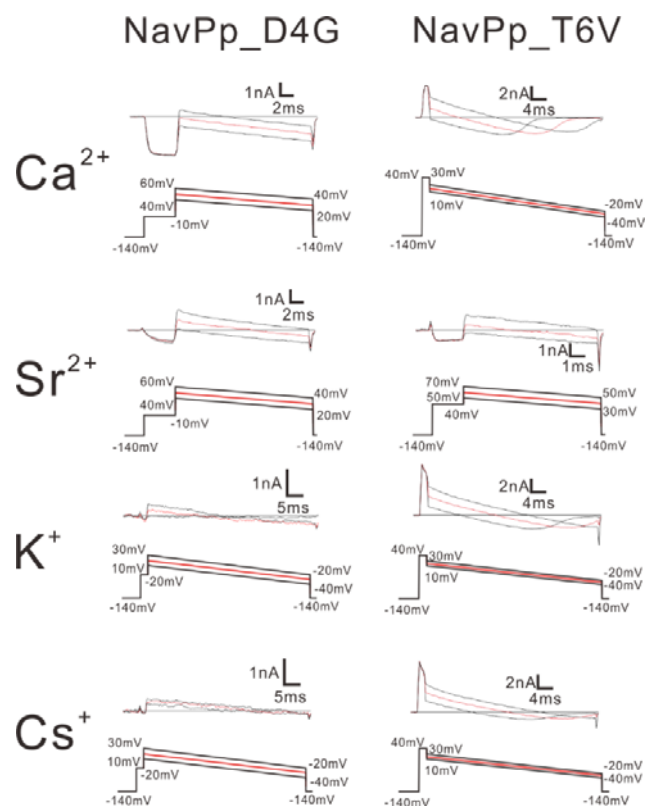

1  
2  
3  
4  
5  
6  
7  
8  
9

**Fig. S6. Representative current traces of the ramp pulse of single point-swapped mutants of NavPp**

To evaluate the relative permeability of  $\text{Ca}^{2+}$ ,  $\text{Sr}^{2+}$ ,  $\text{K}^{+}$  and  $\text{Cs}^{+}$  to  $\text{Na}^{+}$ , Ca solution, Sr solution, K solution and Cs solution were used as the bath solution, respectively. High Na pipette solution was used as the pipette solution. The solution contents were described in material method and Fig. S4. The time course of the membrane potentials was shown at the bottom of each current traces.



## 1 DISCUSSION

### 2 **A native prokaryotic voltage-dependent Ca<sup>2+</sup> channel has a unique Ca<sup>2+</sup> selective** 3 **mechanism.**

4 In this study, we newly characterized two prokaryotic voltage-dependent cation  
5 channels, CavMr and NavPp. CavMr is the first native prokaryotic Cavs reported  
6 despite its BacNav-like “TxExW” motif, and NavPp could be inhibited by high  
7 concentrations of extracellular Ca<sup>2+</sup>. The  $P_{Ca}/P_{Na}$  of CavMr was more than 200 (Fig. 2e  
8 and Table 1), comparable to that of CavAb, an artificial Ca<sup>2+</sup> channel. Anomalous mole  
9 fraction effects were not observed in CavMr (*SI Appendix*, Fig. S2a and b), suggesting  
10 that CavMr has a very high affinity for Ca<sup>2+</sup>. In addition to providing new insights about  
11 general Ca<sup>2+</sup>-selective mechanisms, CavMr has the potential to be a new genetic tool for  
12 upregulating calcium signaling, as BacNavs are useful genetic tools for increasing  
13 action potential firing in mice (Bando et al., 2014; Kamiya et al., 2019; Lin et al., 2010).

14 Phylogenetic analysis demonstrated that CavMr and NavPp are similar to each other,  
15 but distant from canonical BacNavs (Fig. 1a). The high Ca<sup>2+</sup> selectivity of CavMr was  
16 transferable to NavPp. Intriguingly, two pairs of mutants with the same selectivity filter  
17 (CavMr-G4D and NavPp-T6V, CavMr-V6T and NavPp-D4G) showed a very similar  
18 tendency with regard to both the order and extent of cation selectivity (Fig. 5a and c).  
19 Therefore, the basic overall architecture of the NavPp selectivity filter could be similar  
20 to that of CavMr. On the other hand, the Ca<sup>2+</sup> selectivity mechanism of CavMr  
21 completely differs from that of CavAb. Structural comparison of NavAb and CavAb  
22 showed that the aspartate mutations did not alter the main chain trace, and simply  
23 introduced the negative charges around the ion pathway to increase Ca<sup>2+</sup> permeability  
24 (Fig. 7a and b) (Tang et al., 2013). In contrast, in the case of CavMr, two non-charged  
25 residues (Gly4 and Val6) are required for the high Ca<sup>2+</sup> selectivity (Fig. 4c, 5a), but  
26 Asp7 is not necessary (*SI Appendix*, Fig. S2f). A no-charge mutation at position 7,  
27 CavMr-D7M “TLEGWVM”, is an outstanding example demonstrating that high Ca<sup>2+</sup>  
28 selectivity can be achieved in the absence of any aspartates in its filter region (*SI*  
29 *Appendix*, Fig. S2f). Furthermore, the introduction of a negative charge into the  
30 selectivity filter (G4D mutation) had the opposite effect on the Ca<sup>2+</sup> selectivity of  
31 CavMr compared with NavAb and NaChBac (Tang et al., 2014; Yue et al., 2002).  
32 Moreover, the decreased selectivity in G4S also indicates that the glycine at position 4 is  
33 indispensable for Ca<sup>2+</sup> selectivity in CavMr (Fig. 5b). The flexibility and/or small size  
34 of the glycine at position 4 in CavMr might be critical. These findings are inconsistent  
35 with the notion derived from the Ca<sup>2+</sup>-selective mutants of NavAb and NaChBac, and  
36 therefore the native structure of the selectivity filter and the molecular mechanism of

1 ion selectivity of CavMr are thought to differ from those of CavAb. While the structure  
2 of CavMr is not yet available, we are able to speculate on the structure of the selectivity  
3 filter of CavMr on the basis of the structure of human Cav1.1 subdomains I and III (Wu  
4 et al., 2016) (Fig. 6c), whose selectivity filter sequences are very similar to that of  
5 CavMr. In the selectivity filter of Cav1.1 subdomains I and III, the side chain of the  
6 residue at position 7 is shifted outward. The position-4 glycine residue widens the  
7 entrance of the selectivity filter, which would facilitate the entry of hydrated cations into  
8 the ion pore and might increase Ca<sup>2+</sup> selectivity.

9

### 10 **Cavs in prokaryotes and the species-specific tuning of homo-tetrameric channels.**

11 Prokaryotes have a number of putative Ca<sup>2+</sup> binding proteins, such as EF-hand proteins,  
12 P-type Ca<sup>2+</sup> pumps, and Ca<sup>2+</sup> transporters (Domínguez et al., 2015). The intracellular  
13 Ca<sup>2+</sup> concentration is kept low and changes in response to mechanical and chemical  
14 stimuli (Dominguez, 2004). These features imply that prokaryotic Ca<sup>2+</sup> signaling is  
15 similar to that of eukaryotes. The strong ability of CavMr to exclude Na<sup>+</sup> and K<sup>+</sup> along  
16 with Ca<sup>2+</sup> permeation suggests that its primary physiological role is Ca<sup>2+</sup> intake in  
17 response to a voltage change (Fig. 2f and g). In some bacteria, the direction of flagellar  
18 rotation and chemotaxis changes depending on the internal Ca<sup>2+</sup> concentration (Ordal,  
19 1977; Tisa et al., 1993; Tisa and Adler, 1995). *M. ruber* was isolated from hot springs,  
20 and therefore a sufficient amount of Ca<sup>2+</sup> is likely to exist in its native environment  
21 (Loginova et al., 1984). CavMr activation by a voltage change, which could vary  
22 depending on the environmental ionic conditions, might lead to any response to adapt to  
23 the new environment, such as flagellar rotation. These characteristics indicate the  
24 existence of signal coupling between the membrane voltage and Ca<sup>2+</sup>, even in the early  
25 stages of life, which might be the origin of the corresponding functions in eukaryotes,  
26 such as muscle contraction.

27 NavPp permeates more Na<sup>+</sup> than Ca<sup>2+</sup>, but its selectivity is modest (Fig. 3f and Table  
28 1). Notably, *P. pacifica* is a marine myxobacterium that requires NaCl for its growth  
29 (Iizuka et al., 2003). As mentioned above, the basic architecture of the CavMr/NavPp  
30 group is thought to produce a preference for Ca<sup>2+</sup>. *P. pacifica* might modify this channel  
31 architecture to acquire a Na<sup>+</sup> intake pathway, which would likely result in the remaining  
32 feature of low-affinity Ca<sup>2+</sup> inhibition in NavPp. This flexible usage of homo-tetrameric  
33 channels to allow different cations to permeate is also reported in another bacterium,  
34 *Bacillus alkalophilus* (DeCaen et al., 2014). NsvBa from *B. alkalophilus* is a  
35 non-selective channel whose selectivity filter is changed from “TLESWAS”, a typical  
36 Na<sup>+</sup>-selective sequence in alkaliphilic bacillus, to “TLDSWGS”, possibly to adapt to its

1 ionic environment. Recently, an early eukaryote, diatom, was found to have another  
 2 homo-tetrameric channel with no selectivity that has an important role in electrical  
 3 signaling in this species (Helliwell et al., 2019). These findings suggest that the cation  
 4 selectivity of the homo-tetrameric channel family can be flexibly tuned to realize the  
 5 required roles specific to its original species. We also found four homologues that have  
 6 filter sequences similar to CavMr “Tx(E/D)GWx(D/E)” in the NCBI database  
 7 (WP\_009945599.1, WP\_012983075.1, WP\_024079824.1, and XP\_002186055.1).  
 8 XP\_002186055.1 belongs to diatoms, which implies the wide use of monomeric Cavs in  
 9 various organisms – not only prokaryotes, but also eukaryotes.

10

11 **Insights into Ca<sup>2+</sup> selectivity and the evolution of mammalian Cavs.**

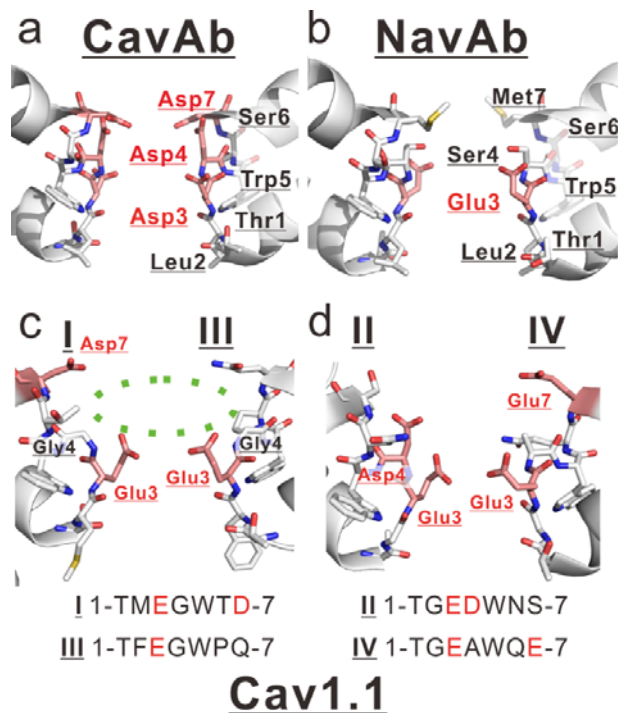

12

13 **Figure 6. Comparison between mammalian and prokaryotic Cav.**

14 a and b). Structures of the selectivity filter in CavAb (PDB code: 4MVZ) and NavAb  
 15 (PDB code: 5YUA). c and d) Structure of the rabbit Cav1.1 selectivity filter (PDB  
 16 code: 5GJV). The subdomains I and III (c), and II and IV (d) were separately shown.  
 17 The carbon atoms of negatively charged residues were indicated in pink. Dashed green  
 18 circle indicates the wide entrance of the selectivity filter.  
 19

20 Aspartate residues are generally observed in the Ca<sup>2+</sup> permeation pathway in ion  
 21 channels, as well as many Ca<sup>2+</sup> binding proteins (Halling et al., 2016; Yan et al., 2015;  
 22 Zalk et al., 2015). Actually, NavAb and NaChBac were successfully transformed to  
 23 Ca<sup>2+</sup>-selective channels with the aspartate-introduced filter sequences “TLDDW(S/A)D”

1 (Tang et al., 2014; Yue et al., 2002). But, our results elucidate that this strategy is not the  
2 only method for achieving high  $\text{Ca}^{2+}$  selectivity. Human Cavs subdomains possess, at  
3 most, two aspartate residues in the selectivity filters in other part than position 3. In  
4 addition, the negatively charged residue at position 3, which is thought to be the most  
5 critical for cation selectivity in both Navs and Cavs, is not aspartate, but glutamate in  
6 most of the human Cavs subdomains (Yu and Catterall, 2004). CavAb has 12 aspartates  
7 in the selectivity filter of a channel tetramer, while there are 4 aspartates in CavMr. The  
8 net negative charge is 5~7 in mammalian Cavs, 8 in CavMr, and 12 in CavAb. These  
9 findings indicate that  $\text{Ca}^{2+}$  selectivity can be achieved with even fewer negative charges  
10 than CavAb and close to mammalian Cav, probably with the contribution of a special  
11 backbone structure around the selectivity filters.

12 It is noteworthy that the selectivity filter sequence of CavMr is very similar to those of  
13 human Cav subdomains I and III, both of which possess a glycine at position 4 (Fig. 6c).  
14 Especially, the Cav3.1 and 3.2 subdomains I have the same sequence as CavMr. On the  
15 other hand, the sequences of subdomains II and IV are relatively similar to that of  
16 CavAb (Fig. 6d). These sequence similarities of the glycine residue at position 4 are  
17 also found in CatSper, the sperm calcium permeable channel (Darszon et al., 2011). The  
18 channel region of CatSper is formed by four different subunits (CatSper1-4). The  
19 selectivity filters of CatSper 3 “TVDGWTD” and CatSper 4 “TQDGWVD” are similar  
20 to that of CavMr and share a glycine residue at position 4 as well as subdomains I and  
21 III of 24TM Cavs. These similarities indicate the generality of the CavMr-like  
22  $\text{Ca}^{2+}$ -selectivity mechanism. Further investigation of the detailed structure of CavMr  
23 may help to elucidate the principles and origin underlying  $\text{Ca}^{2+}$  selectivity.

24

1

## 2 **Material and methods**

### 3 **Cloning of BacNav homologues and site-directed mutagenesis**

4 The NaChBac amino acid sequence (NP\_242367) was used as the query for a  
5 BLASTP search against the Microbial Genomic database at NCBI. The identified  
6 primary sequence data were obtained from Entrez at NCBI (*Meiothermus ruber* as  
7 ZP\_04038264, *Plesiocystis pacifica* as ZP\_01909854, *Halomonas elongata* as  
8 YP\_003896792 and *Teredinibacter turnerae* as YP\_003073405). These DNAs were  
9 synthesized by Genscript Inc. and subcloned into the pCI vector (Promega) using the  
10 EcoRI and SalI sites and the pBiEX vector (Novagen) using NcoI and BamHI sites,  
11 respectively. Site-directed mutagenesis was achieved by polymerase chain reaction  
12 (PCR) of the full-length plasmid containing the Nav gene using PrimeSTAR<sup>®</sup> MAX  
13 DNA Polymerase (Takara Bio.). All clones were confirmed by DNA sequencing.

14

### 15 **Electrophysiological analysis using mammalian cells**

16 For the recordings related to mole fraction effects (Fig. S2a-d), currents were recorded  
17 from Chinese hamster ovary (CHO) -K1 cells expressing channels. The recordings were  
18 performed as described previously (Tateyama and Kubo, 2018). Cells were transfected  
19 with channel DNAs using the LipofectAMINE 2000 (Invitrogen) and plated onto cover  
20 slips. Currents were recorded 24-36 h after transfection. Current recording by the whole  
21 cell patch clamp technique was performed using Axopatch 200B amplifiers,  
22 Digidata1332A, and pClamp 9 software (Molecular Devices). The pipette solution  
23 contained 130 mM KCl, 5 mM Na<sub>2</sub>-ATP, 3 mM EGTA, 0.1 mM CaCl<sub>2</sub>, 4 mM MgCl<sub>2</sub>  
24 and 10 mM HEPES (pH 7.2 adjusted with KOH). The bath solution contained 135 mM  
25 NaCl, 4 mM KCl, 1 mM CaCl<sub>2</sub>, 5 mM MgCl<sub>2</sub> and 10 mM HEPES (pH 7.4 adjusted with  
26 NaOH). For the measurement of mole fraction effects, the bath solutions containing  
27 different ratio of NaCl / CaCl<sub>2</sub> (135/0, 108/18, 81/36, 54/54, 27/82 and 0/90 mM)  
28 were used. The Ca<sup>2+</sup>-free solution was achieved with the solution containing 135 mM  
29 NaCl, 1 mM EGTA and 0 mM CaCl<sub>2</sub>.

30

### 31 **Electrophysiological measurement in insect cells**

32 The recordings other than those for mole fraction effects were performed using SF-9  
33 cells. SF-9 cells were grown in Sf-900<sup>™</sup> III medium (Gibco) complemented with 0.5%  
34 100× Antibiotic-Antimycotic (Gibco) at 27°C. Cells were transfected with target  
35 channel-cloned pBiEX vectors and enhanced green fluorescent protein (EGFP)-cloned  
36 pBiEX vectors using Fugene HD transfection reagent (Promega). The channel-cloned

1 vector (2  $\mu\text{g}$ ) was mixed with 0.5  $\mu\text{g}$  of the EGFP-cloned vector in 100 $\mu\text{L}$  of the culture  
2 medium. Next, 3  $\mu\text{L}$  Fugene HD reagent was added and the mixture was incubated for  
3 10 min before the transfection mixture was gently dropped onto cultured cells. After  
4 incubation for 16-48 h, the cells were used for electrophysiological measurements. In  
5 the measurement of I-V relation curves, the pipette solution contains 75 mM NaF, 40  
6 mM CsF, 35 mM CsCl, 10 mM EGTA, and 10 mM HEPES (pH 7.4 adjusted by CsOH)  
7 For evaluation of ion selectivity, high Na pipette solution (115 mM NaF, 35 mM NaCl,  
8 10 mM EGTA, and 10 mM HEPES (pH 7.4 adjusted by NaOH)) was used. For the  
9 evaluation of Ca, Sr, K and Cs selectivity, Ca solution (100 mM  $\text{CaCl}_2$ , 10 mM HEPES  
10 (pH 7.4 adjusted by  $\text{Ca}(\text{OH})_2$ ), and 10 mM glucose), Sr solution (100 mM  $\text{SrCl}_2$ , 10  
11 mM HEPES (pH 7.4 adjusted by  $\text{Sr}(\text{OH})_2$ ), and 10 mM glucose), K solution (150 mM  
12 KCl, 2mM  $\text{CaCl}_2$ , 10 mM HEPES (pH 7.4 adjusted by KOH), and 10 mM glucose), and  
13 Cs solution (150 mM CsCl, 2mM  $\text{CaCl}_2$ , 10 mM HEPES (pH 7.4 adjusted by CsOH),  
14 and 10 mM glucose) were used as the bath solution, respectively.  $E_{\text{rev}}$  of high  $\text{Ca}^{2+}$   
15 selective channels were measured under three external solutions containing 144mM  
16 NMDG-Cl and 4mM  $\text{CaCl}_2$ , 135mM NMDG-Cl and 10mM  $\text{CaCl}_2$ , 120mM NMDG-Cl  
17 and 20mM  $\text{CaCl}_2$  (10mM HEPES pH 7.4 adjusted with HCl). And  $E_{\text{rev}}$  of high  $\text{Ca}^{2+}$   
18 selective channels for the calculation of  $P_{\text{K}}/P_{\text{Ca}}$  and  $P_{\text{Cs}}/P_{\text{Ca}}$  were measured under  
19 external solutions containing 135mM NMDG-Cl and 10mM  $\text{CaCl}_2$  (10mM HEPES pH  
20 7.4 adjusted with HCl) with high K pipette solution (115 mM KF, 35 mM KCl, 10 mM  
21 EGTA, and 10 mM HEPES (pH 7.4 adjusted by KOH)) and high Cs pipette solution  
22 (115 mM CsF, 35 mM CsCl, 10 mM EGTA, and 10 mM HEPES (pH 7.4 adjusted by  
23 CsOH)), respectively.  $E_{\text{rev}}$  of NavPp for the calculation of  $P_{\text{Ca}}/P_{\text{Na}}$  or  $P_{\text{Sr}}/P_{\text{Na}}$  were  
24 measured under external solution containing 50mM NMDG-Cl, 40mM NaCl, 40mM  
25  $\text{CaCl}_2$  or  $\text{SrCl}_2$  and 10mM HEPES pH 7.4 adjusted with NaOH.  $E_{\text{rev}}$  of NavPp for the  
26 calculation of  $P_{\text{Cs}}/P_{\text{Na}}$  was measured under high Cs pipette solution and external  
27 solution containing 110mM NMDG-Cl, 40mM NaCl, 3mM  $\text{CaCl}_2$  and 10mM HEPES  
28 pH 7.4 adjusted with NaOH.

29 As the pipette solution for measurement of the Ca block effect in NavPp, low Na  
30 pipette solution (140 mM CsF, 10 mM NaCl, 10 mM EGTA, and 10 mM HEPES (pH  
31 7.4 adjusted by CsOH)) and high Na pipette solution were used for inward and outward  
32 current measurement, respectively. As a bath solution, Ca blocking solution (30 mM  
33 NaCl, 120 mM NMDG-Cl, 1.5 mM  $\text{CaCl}_2$ , 10 mM HEPES (pH 7.4 adjusted by NaOH)  
34 and 10 mM glucose) was used for the 1.5 mM Ca blocking condition. In 10mM Ca  
35 blocking condition, a bath solution contains 30 mM NaCl, 105 mM NMDG-Cl, 10 mM  
36  $\text{CaCl}_2$ , 10 mM HEPES (pH 7.4 adjusted by NaOH) and 10 mM glucose. And, in each

1 Ca blocking conditions, 15 mM NMDG-Cl was replaced per 10 mM CaCl<sub>2</sub>. The bath  
2 solution was changed using the Dynaflo<sup>®</sup> Resolve system. All experiments were  
3 conducted at 25 ± 2°C. All results are presented as mean ± standard error.

#### 4 5 **Calculation of ion selectivity by the GHK equation**

6 To determine the ion selectivity of each channel, the intracellular solution and  
7 extracellular solution were arbitrarily set and the reversal potential at each concentration  
8 was measured by giving the ramp pulse of membrane potential. The applied ramp pulse  
9 was set to include the reversal potential. In addition, a depolarization stimulus of 2-10  
10 ms was inserted to check whether the behavior of the cell changed for each  
11 measurement. As a result,  $P_{Ca}/P_{Na}$  was calculated by substituting the obtained reversal  
12 potential ( $E_{rev}$ ) into the expression derived from the GHK equation (Frazier et al., 2000);

$$P_{Ca}/P_{Na} = \frac{-([Na]_i - [Na]_o e^{-E_{rev}F/RT})(1 - e^{-2E_{rev}F/RT})}{4([Ca]_i - [Ca]_o e^{-2E_{rev}F/RT})(1 - e^{-E_{rev}F/RT})}$$

13 where  $F$  is Faraday's constant,  $R$  is the Gas constant, and  $T$  is 298.1[K]. The same  
14 expression was used for Sr<sup>2+</sup>. The Sr<sup>2+</sup> selectivity ( $P_{Sr}/P_{Na}$ ) was measured in the same  
15 way.

16 Na<sup>+</sup> selectivity against monovalent cations ( $P_M/P_{Na}$ ) was calculated by substituting the  
17 obtained reversal potential and  $P_{Ca}/P_{Na}$  into the expression derived from the GHK  
18 equation (Lopin et al., 2012):

$$P_M/P_{Na} = \left[ \frac{-4([Ca]_i - [Ca]_o e^{-2E_{rev}F/RT})(1 - e^{-E_{rev}F/RT})}{([Na]_i - [Na]_o e^{-E_{rev}F/RT})(1 - e^{-2E_{rev}F/RT})} \cdot (P_{Ca}/P_{Na}) \right. \\ \left. - 1 \right] \left[ \frac{([Na]_i - [Na]_o e^{-E_{rev}F/RT})}{([M]_i - [M]_o e^{-E_{rev}F/RT})} \right]$$

19

#### 20 **References**

- 21 Almers W, McCleskey EW. 1984. Non-selective conductance in calcium channels of  
22 frog muscle: calcium selectivity in a single-file pore. *J Physiol* **353**:585–608.  
23 doi:10.1113/jphysiol.1984.sp015352
- 24 Bando Y, Irie K, Shimomura T, Umeshima H, Kushida Y, Kengaku M, Fujiyoshi Y,  
25 Hirano T, Tagawa Y. 2014. Control of Spontaneous Ca<sup>2+</sup> Transients Is Critical for  
26 Neuronal Maturation in the Developing Neocortex. *Cereb Cortex*.  
27 doi:10.1093/cercor/bhu180
- 28 Catterall W. 2000. From ionic currents to molecular mechanisms: the structure and  
29 function of voltage-gated sodium channels. *Neuron* **26**:13–25.
- 30 Darszon A, Nishigaki T, Beltran C, Treviño CL. 2011. Calcium Channels in the

- 1           Development, Maturation, and Function of Spermatozoa. *Physiol Rev*  
2           **91**:1305–1355. doi:10.1152/physrev.00028.2010
- 3   DeCaen PG, Takahashi Y, Krulwich T a, Ito M, Clapham DE. 2014. Ionic selectivity  
4           and thermal adaptations within the voltage-gated sodium channel family of  
5           alkaliphilic Bacillus. *Elife* **3**:1–15. doi:10.7554/eLife.04387
- 6   Dominguez DC. 2004. Calcium signalling in bacteria. *Mol Microbiol* **54**:291–297.  
7           doi:10.1111/j.1365-2958.2004.04276.x
- 8   Domínguez DC, Guragain M, Patrauchan M. 2015. Calcium binding proteins and  
9           calcium signaling in prokaryotes. *Cell Calcium* **57**:151–165.  
10          doi:10.1016/j.ceca.2014.12.006
- 11   Finol-Urdaneta RK, Wang Y, Al-Sabi A, Zhao C, Noskov SY, French RJ. 2014.  
12          Sodium channel selectivity and conduction: prokaryotes have devised their own  
13          molecular strategy. *J Gen Physiol* **143**:157–71. doi:10.1085/jgp.201311037
- 14   Frazier CJ, George EG, Jones SW. 2000. Apparent change in ion selectivity caused by  
15          changes in intracellular K(+) during whole-cell recording. *Biophys J* **78**:1872–80.  
16          doi:10.1016/S0006-3495(00)76736-1
- 17   Halling DB, Liebeskind BJ, Hall AW, Aldrich RW. 2016. Conserved properties of  
18          individual Ca<sup>2+</sup>-binding sites in calmodulin. *Proc Natl Acad Sci*  
19          **113**:E1216–E1225. doi:10.1073/pnas.1600385113
- 20   Heinemann SH, Terlau H, Stühmer W, Imoto K, Numa S. 1992. Calcium channel  
21          characteristics conferred on the sodium channel by single mutations. *Nature*  
22          **356**:441–443.
- 23   Helliwell KE, Chrachri A, Koester JA, Wharam S, Verret F, Taylor AR, Wheeler GL,  
24          Brownlee C. 2019. Alternative Mechanisms for Fast Na<sup>+</sup>/Ca<sup>2+</sup> Signaling in  
25          Eukaryotes via a Novel Class of Single-Domain Voltage-Gated Channels. *Curr*  
26          *Biol* **29**:1503-1511.e6. doi:10.1016/j.cub.2019.03.041
- 27   Hille B. 2001. Ion Channels of Excitable Membranes, Third Edition (Sunderland, MA:  
28          Sinauer Associates Inc).
- 29   Iizuka T, Jojima Y, Fudou R, Hiraishi A, Ahn JW, Yamanaka S. 2003. Plesiocystis  
30          pacifica gen. nov., sp. nov., a marine myxobacterium that contains dihydrogenated  
31          menaquinone, isolated from the Pacific coasts of Japan. *Int J Syst Evol Microbiol*  
32          **53**:189–195. doi:10.1099/ijs.0.02418-0
- 33   Irie K, Haga Y, Shimomura T, Fujiyoshi Y. 2018. Optimized expression and  
34          purification of NavAb provide the structural insight into the voltage dependence.  
35          *FEBS Lett* **592**:274–283. doi:10.1002/1873-3468.12955
- 36   Irie K, Kitagawa K, Nagura H, Imai T, Shimomura T, Fujiyoshi Y. 2010. Comparative



- 1 study of the gating motif and C-type inactivation in prokaryotic voltage-gated  
2 sodium channels. *J Biol Chem* **285**:3685–94. doi:10.1074/jbc.M109.057455
- 3 Irie K, Shimomura T, Fujiyoshi Y. 2012. The C-terminal helical bundle of the  
4 tetrameric prokaryotic sodium channel accelerates the inactivation rate. *Nat*  
5 *Commun* **3**:793. doi:10.1038/ncomms1797
- 6 Ito M, Xu H, Guffanti AA, Wei Y, Zvi L, Clapham DE, Krulwich TA. 2004. The  
7 voltage-gated Na<sup>+</sup> channel NaVBP has a role in motility, chemotaxis, and pH  
8 homeostasis of an alkaliphilic *Bacillus*. *Proc Natl Acad Sci* **101**:10566–10571.  
9 doi:10.1073/pnas.0402692101
- 10 Kamiya A, Hayama Y, Kato S, Shimomura A, Shimomura T, Irie K, Kaneko R,  
11 Yanagawa Y, Kobayashi K, Ochiya T. 2019. Genetic manipulation of autonomic  
12 nerve fiber innervation and activity and its effect on breast cancer progression. *Nat*  
13 *Neurosci*. doi:10.1038/s41593-019-0430-3
- 14 Koishi R, Xu H, Ren D, Navarro B. 2004. A superfamily of voltage-gated sodium  
15 channels in bacteria. *J Biol Chem* **279**:9532–9538. doi:10.1074/jbc.M313100200
- 16 Lee S, Goodchild SJ, Ahern CA. 2012. Molecular and functional determinants of local  
17 anesthetic inhibition of NaChBac. *Channels (Austin)* **6**:403–406.  
18 doi:10.4161/chan.21807
- 19 Lin CW, Sim S, Ainsworth A, Okada M, Kelsch W, Lois C. 2010. Genetically  
20 Increased Cell-Intrinsic Excitability Enhances Neuronal Integration into Adult  
21 Brain Circuits. *Neuron* **65**:32–39. doi:10.1016/j.neuron.2009.12.001
- 22 Loginova LG, Egorova LA, Golovacheva RS, Seregina LM. 1984. *Thermus ruber* sp.  
23 nov., nom. rev. *Int J Syst Bacteriol* **34**:498–499. doi:10.1099/00207713-34-4-498
- 24 Lopin K V., Thevenod F, Page JC, Jones SW. 2012. Cd<sup>2+</sup> Block and Permeation of  
25 CaV3.1 ( $\alpha$ 1G) T-Type Calcium Channels: Candidate Mechanism for Cd<sup>2+</sup> Influx.  
26 *Mol Pharmacol* **82**:1183–1193. doi:10.1124/mol.112.080176
- 27 Nagura H, Irie K, Imai T, Shimomura T, Hige T, Fujiyoshi Y. 2010. Evidence for  
28 lateral mobility of voltage sensors in prokaryotic voltage-gated sodium channels.  
29 *Biochem Biophys Res Commun* **399**:341–6. doi:10.1016/j.bbrc.2010.07.070
- 30 Ordal GW. 1977. Calcium ion regulates chemotactic behaviour in bacteria. *Nature*  
31 **270**:66–67. doi:10.1038/270066a0
- 32 Rahman T, Cai X, Brailoiu GC, Aboud ME, Brailoiu E, Patel S. 2014. Two-pore  
33 channels provide insight into the evolution of voltage-gated Ca<sup>2+</sup> and Na<sup>+</sup>  
34 channels. *Sci Signal* **7**:ra109–ra109. doi:10.1126/scisignal.2005450
- 35 Ren D, Navarro B, Xu H, Yue L, Shi Q, Clapham DE. 2001. A prokaryotic  
36 voltage-gated sodium channel. *Science* **294**:2372–5. doi:10.1126/science.1065635

- 1 Shimomura T, Irie K, Fujiyoshi Y. 2016. Molecular determinants of prokaryotic  
2 voltage-gated sodium channels for recognition of local anesthetics. *FEBS J*  
3 **283**:2881–2895. doi:10.1111/febs.13776
- 4 Shimomura T, Irie K, Nagura H, Imai T, Fujiyoshi Y. 2011. Arrangement and mobility  
5 of the voltage sensor domain in prokaryotic voltage-gated sodium channels. *J Biol*  
6 *Chem* **286**:7409–7417. doi:10.1074/jbc.M110.186510
- 7 Strong M, Chandy KG, Gutman GA. 1993. Molecular evolution of voltage-sensitive ion  
8 channel genes: on the origins of electrical excitability. *Mol Biol Evol* **10**:221–42.  
9 doi:10.1093/oxfordjournals.molbev.a039986
- 10 Tang L, Gamal El-Din TM, Payandeh J, Martinez GQ, Heard TM, Scheuer T, Zheng N,  
11 Catterall W a. 2014. Structural basis for Ca<sup>2+</sup> selectivity of a voltage-gated  
12 calcium channel. *Nature* **505**:56–61. doi:10.1038/nature12775
- 13 Tang L, Gamal El-Din TM, Payandeh J, Martinez GQ, Heard TM, Scheuer T, Zheng N,  
14 Catterall WA. 2013. Structural basis for Ca<sup>2+</sup> selectivity of a voltage-gated  
15 calcium channel. *Nature* **505**:56–61. doi:10.1038/nature12775
- 16 Tang L, Gamal El-Din TM, Swanson TM, Pryde DC, Scheuer T, Zheng N, Catterall  
17 WA. 2016. Structural basis for inhibition of a voltage-gated Ca<sup>2+</sup> channel by Ca<sup>2+</sup>  
18 antagonist drugs. *Nature* **537**:117–121. doi:10.1038/nature19102
- 19 Tateyama M, Kubo Y. 2018. Gi/o-coupled muscarinic receptors co-localize with GIRK  
20 channel for efficient channel activation. *PLoS One* **13**:1–18.  
21 doi:10.1371/journal.pone.0204447
- 22 Tisa LS, Adler J. 1995. Cytoplasmic free-Ca<sup>2+</sup> level rises with repellents and falls with  
23 attractants in *Escherichia coli* chemotaxis. *Proc Natl Acad Sci U S A* **92**:10777–81.  
24 doi:10.1073/pnas.92.23.10777
- 25 Tisa LS, Olivera BM, Adler J. 1993. Inhibition of *Escherichia coli* chemotaxis by  
26 omega-conotoxin, a calcium ion channel blocker. *J Bacteriol* **175**:1235–1238.  
27 doi:10.1128/jb.175.5.1235-1238.1993
- 28 Tsai CJ, Tani K, Irie K, Hiroaki Y, Shimomura T, McMillan DG, Cook GM, Schertler  
29 GFX, Yoshinori F, Li XD. 2013. Two alternative conformations of a voltage-gated  
30 sodium channel. *J Mol Biol* **425**:4074–4088. doi:10.1016/j.jmb.2013.06.036
- 31 Wu J, Yan Z, Li Z, Qian X, Lu S, Dong M, Zhou Q, Yan N. 2016. Structure of the  
32 voltage-gated calcium channel Cav1.1 at 3.6 Å resolution. *Nature* **537**:191–196.  
33 doi:10.1038/nature19321
- 34 Yan Z, Bai XC, Yan C, Wu J, Li Z, Xie T, Peng W, Yin CC, Li X, Scheres SHW, Shi Y,  
35 Yan N. 2015. Structure of the rabbit ryanodine receptor RyR1 at near-atomic  
36 resolution. *Nature* **517**:50–55. doi:10.1038/nature14063

- 1 Yu FH, Catterall W a. 2004. The VGL-chanome: a protein superfamily specialized for  
2 electrical signaling and ionic homeostasis. *Sci STKE* **2004**:re15.  
3 doi:10.1126/stke.2532004re15
- 4 Yue L, Navarro B, Ren D, Ramos A, Clapham DE. 2002. The cation selectivity filter of  
5 the bacterial sodium channel, NaChBac. *J Gen Physiol* **120**:845.  
6 doi:10.1085/jgp.20028699
- 7 Zalk R, Clarke OB, Georges A Des, Grassucci RA, Reiken S, Mancina F, Hendrickson  
8 WA, Frank J, Marks AR. 2015. Structure of a mammalian ryanodine receptor.  
9 *Nature* **517**:44–49. doi:10.1038/nature13950
- 10  
11

1

2 **Acknowledgements**

3 We very appreciate to Dr. Yoshihiro Kubo for the critical suggestion about the  
4 structure of our manuscript. This work was supported by Grants-in-Aid for Scientific  
5 Research (S), a Grant-in-Aid for Young Scientists (B), the Japan Agency for Medical  
6 Research and Development and the Toyoaki Scholarship Foundation.

7

8 **Author contribution**

9 T.S. and K.I. conducted the experiments; T.S. searched for homologues; Y.Y. and K.I.  
10 performed the electrophysiological experiments of insect cells; M.T. performed the  
11 electrophysiological experiments of mammalian cells; T.S., Y.Y., H.N. and K.I.  
12 optimized the measurement conditions; T.S., Y.Y., H.N., Y.F. and K.I. contributed to the  
13 study design and wrote the paper.

14

1 **Figure legends.**

2

3 **Table1. Relative permeability of CavMr and NavPp**

4

5 **Figure 1. Sequence analysis and the representative current recordings of the novel**  
6 **BacNav homologues**

7 a). Phylogenetic tree of the BacNav homologues with their GenBank™ accession  
8 numbers. The ClustalW program was used to align the multiple protein sequences of the  
9 BacNav homologues. The phylogenetic tree was generated using “PROTDIST”, one of  
10 the PHYLIP package (Phylogeny Inference Package:  
11 <http://evolution.genetics.washington.edu/phylip.html>). The branch lengths are  
12 proportional to the sequence divergence, with the scale bar corresponding to 0.1  
13 substitution per amino acid position. Four homologues colored that are not included in  
14 canonical BacNavs were cloned and expressed to check the current activity. Those of  
15 two which are underlined in red and shown as bold generated the detectable currents. b).  
16 Schematic secondary structure and selectivity filter sequence of BacNavs and human  
17 Cavs. Cylinder indicates  $\alpha$ -helix. The selectivity filter sequences are indicated by  
18 alphabetical characters. Negatively charged residues are colored by red. Glycine  
19 residues in the position 4 are colored by cyan. The straight lines indicate the other part  
20 of pore domain. The selectivity filter sequence of hCav1.1 (UniProt ID: Q13698),  
21 hCav2.1 (O00555) and hCav3.1 (O43497), were used. c and d). Representative current  
22 traces to obtain the current-voltage relationships of CavMr (c) and NavPp (d) in Sf9  
23 cells. The straight lines indicating the zero-current level in the representative current  
24 traces. Currents were generated under the bath solutions containing high  $\text{Na}^+$  (top) and  
25 high  $\text{Ca}^{2+}$  (middle), by a series of step-pulses shown in bottom. e and f). Current-voltage  
26 relationships of CavMr (e) and NavPp (f) measured under the different bath solutions  
27 (filled black; 150 mM NaCl, open black; 75 mM NaCl and 75 mM NMDG-HCl, open  
28 red; 75 mM NaCl and 50 mM  $\text{CaCl}_2$ , filled red; 50 mM  $\text{CaCl}_2$  and 75 mM NMDG-HCl).  
29 Currents of CavMr and NavPp were normalized to that by 0mV depolarization stimuli  
30 under 75 mM NaCl and 50 mM  $\text{CaCl}_2$  bath solution and 150 mM NaCl bath solution,  
31 respectively.

32

33 **Figure 2. Cation selectivity of CavMr**

34 a and b). Recordings of the reversal potential of CavMr currents using the ramp protocol.  
35 Currents were generated by the step pulse of -20 mV from -140 mV holding potential,  
36 followed by the ramp pulses with different voltage values (shown at the bottom of

1 panels a and b). The values of the reversal potential recorded with three different ramp  
2 pulses were averaged. Currents were measured under the bath solution containing 4 mM  
3 (a) and 10 and 20 mM (b)  $\text{CaCl}_2$  and the pipette solution with 150 mM NaCl. c). The  
4 plot of the reversal potential to the bath  $[\text{Ca}^{2+}]_{\text{out}}$ . Each value was obtained using the  
5 protocol shown in a and b. The relationship was fitted by a line with the slope of  
6  $41.07 \pm 2.64$  mV per decade ( $n = 4$ ). d). Representative current traces to obtain the  
7 reversal potential under the condition of 100 mM  $[\text{Sr}^{2+}]_{\text{out}}$  and 150 mM  $[\text{Na}^+]_{\text{in}}$ . Currents  
8 were generated by the protocol shown in the lower part. e). Representative current  
9 traces to investigate the  $P_{\text{Cs}}/P_{\text{Ca}}$  and  $P_{\text{K}}/P_{\text{Ca}}$ , the pipette solutions contained 150 mM  
10  $[\text{Cs}^+]_{\text{in}}$  for  $P_{\text{Cs}}/P_{\text{Ca}}$  and 150 mM  $[\text{K}^+]_{\text{in}}$  for  $P_{\text{K}}/P_{\text{Ca}}$ , while the bath solution contained 10  
11 mM  $[\text{Ca}^{2+}]_{\text{out}}$  in both cases. f). The relative permeability of  $\text{Ca}^{2+}$  or  $\text{Sr}^{2+}$  to  $\text{Na}^+$  in CavMr,  
12 calculated from the reversal potential that was obtained in a, b, and d. g). The relative  
13 permeability of each monovalent cation to  $\text{Ca}^{2+}$  in CavMr, derived from the data shown  
14 in e.

15

### 16 **Figure 3. $\text{Na}^+$ permeability and the extracellular $\text{Ca}^{2+}$ -dependent inhibition in**

#### 17 **NavPp**

18 a)  $[\text{Ca}^{2+}]_{\text{out}}$  dependent inhibitory effects in NavPp. Currents were normalized to those  
19 under 1.5 mM  $[\text{Ca}^{2+}]_{\text{out}}$  (filled square; NavAb current in the 30 mM  $[\text{Na}^+]_{\text{out}}$  and 10 mM  
20  $[\text{Na}^+]_{\text{in}}$  (representative data are shown in Fig. S3b), open triangle down; NavPp inward  
21 current in the 30 mM  $[\text{Na}^+]_{\text{out}}$  and 10 mM  $[\text{Na}^+]_{\text{in}}$  (Fig. S3a), open triangle up; NavPp  
22 outward current in the 30 mM  $[\text{Na}^+]_{\text{out}}$  and 150 mM  $[\text{Na}^+]_{\text{in}}$  (Fig. S3c), filled triangle up;  
23 NavPp outward current in the 0 mM  $[\text{Na}^+]_{\text{out}}$  and 150 mM  $[\text{Na}^+]_{\text{in}}$ . b). Representative  
24 currents to obtain the reversal potential in NavPp for  $P_{\text{Ca}}/P_{\text{Na}}$ . Currents were generated  
25 by the ramp protocol shown in bottom.  $[\text{Ca}^{2+}]_{\text{out}}$  was varied from 10 to 60 mM with the  
26 fixed  $[\text{Na}^+]$  both in the bath (60mM) and pipette (150mM). c). Representative currents  
27 to obtain the reversal potential in NavPp for  $P_{\text{Sr}}/P_{\text{Na}}$ . Currents were generated by the  
28 ramp protocol shown in bottom.  $[\text{Sr}^{2+}]_{\text{out}}$  was 40 mM with the fixed  $[\text{Na}^+]$  both in the  
29 bath (40mM) and pipette (150mM). d). The relative permeability of different cation  
30 species to  $\text{Na}^+$  in NavPp, calculated from the reversal potential that was obtained in b, c  
31 and Fig.S3d and e.

32

### 33 **Figure 4. The cation selectivity of the swapping mutant channels in their selectivity**

#### 34 **filter between CavMr and NavPp**

35 a) Amino acid sequences of the selectivity filter in the swapped mutants, CavMr-Pp,  
36 Nav-Pp, NavAb\_Mr, and CavMr\_Ab. The selectivity filter sequences of CavMr, and

1 NavPp, and NavAb are indicated by alphabetical characters with cyan, red, and gray  
2 shade, respectively. Negatively charged residues are colored by red. Glycine residues  
3 are colored by cyan. The straight lines of cyan, red, and black indicates the other part of  
4 pore domain of CavMr, NavPp, and NavAb, respectively. b) Pore domains of crystal  
5 structure of NavAb (PDB code:5YUA). The selectivity filter, which corresponds to the  
6 sequences shown in a, was indicated in red. c) The relative permeability of divalent  
7 cations to Na<sup>+</sup> (left) and that of monovalent cations to Ca<sup>2+</sup> (right) in NavPp-Mr. d) The  
8 relative permeability of different cation species to Na<sup>+</sup> in CavMr-Pp.  
9

10 **Figure 5. The single point mutations losing and obtaining Ca<sup>2+</sup> selectivity of CavMr**  
11 **and NavPp, respectively.**

12 a) The relative permeability of each cation species to Na<sup>+</sup> in the single-point mutants of  
13 CavMr. The selectivity filter of CavMr was changed to the corresponding residues of  
14 NavPp at position 4 (G4D) and position 6 (V6T), respectively b) The relative  
15 permeability of each cation species to Na<sup>+</sup> in the G4S mutants of CavMr, whose  
16 position 4 residue of the selectivity filter was mutated to the corresponding residue of  
17 canonical BacNavs. c) The relative permeability of each cation species to Na<sup>+</sup> in the  
18 single-point mutants of NavPp. The selectivity filter of NavPp was changed to the  
19 corresponding residues of CavMr at position 4 (D4G) and position 6 (T6V),  
20 respectively.  
21

22 **Figure 6. Comparison between mammalian and prokaryotic Cav.**

23 a and b). Structures of the selectivity filter in CavAb (PDB code: 4MVZ) and NavAb  
24 (PDB code: 5YUA). c and d) Structure of the rabbit Cav1.1 selectivity filter (PDB code:  
25 5GJV). The subdomains I and III (c), and II and IV (d) were separately shown. The  
26 carbon atoms of negatively charged residues were indicated in pink. Dashed green circle  
27 indicates the wide entrance of the selectivity filter.  
28  
29
